# Supplementary material for: Height and body fatness and colorectal cancer risk: an update of the WCRF–AICR systematic review of published prospective studies
Source: PubMed Central journal article supplement (PMC6060816; doi:10.1007/s00394-017-1557-1), 2017-10-28

**Supplementary Table 1. Main characteristics of included studies**

| Author, Year, Country | Study name, characteristics                                                  | Cases/<br>Study size<br>Follow-up<br>(years) | Case<br>ascertainment                                                        | Exposure<br>assessment                                                                                        | Exposure | Outcome                      | Adjustment factors                                                                                                                                                                                                                                                                     |
|-----------------------|------------------------------------------------------------------------------|----------------------------------------------|------------------------------------------------------------------------------|---------------------------------------------------------------------------------------------------------------|----------|------------------------------|----------------------------------------------------------------------------------------------------------------------------------------------------------------------------------------------------------------------------------------------------------------------------------------|
| Burón Pust A, 2017 UK | Million Women Study, Prospective Cohort, Age: 56 years, W, Screening Program | 18 518/<br>1 310 390<br>13.8 years           | Record linkage with the UK/NHS central register                              | Self-reported                                                                                                 | BMI      | Incidence, colorectal cancer | Age, age at menarche, age at menopause, alcohol, height, HRT use, hysterectomy, number of birth, oral contraceptive use, parity, region, smoking, socio-economic status, sterilisation, strenuous exercise                                                                             |
|                       |                                                                              | 12 761                                       |                                                                              |                                                                                                               |          | Incidence, colon cancer      |                                                                                                                                                                                                                                                                                        |
|                       |                                                                              | 5 757                                        |                                                                              |                                                                                                               |          | Incidence, rectal cancer     |                                                                                                                                                                                                                                                                                        |
|                       |                                                                              | 18 518/<br>12 761<br>5 757                   |                                                                              |                                                                                                               | Height   | Incidence, colorectal cancer |                                                                                                                                                                                                                                                                                        |
|                       |                                                                              | 12 761                                       |                                                                              |                                                                                                               |          | Incidence, colon cancer      |                                                                                                                                                                                                                                                                                        |
|                       |                                                                              | 5 757                                        |                                                                              |                                                                                                               |          | Incidence, rectal cancer     |                                                                                                                                                                                                                                                                                        |
| Groessl, 2016 USA     | WHI, Prospective Cohort, Age: 50-79 years, W, Postmenopausal                 | 1 282/<br>83 778<br>12.9 years               | Self-report verified by pathology reports and medical records                | Physical measurements such as height and weight were collected by trained staff at a baseline clinical visit. | BMI      | Incidence, colorectal cancer | Age, alcohol, calcium, coffee, education, energy intake, ethnicity, family history of colorectal cancer, fibre, fruit and vegetables intake, history of diabetes, hormone use, NSAID use, pack years of smoking, percent calories from fat, period, physical activity, red meat intake |
| Hanyuda, 2016 USA     | NHS-HPFS, Prospective Cohort, Age: 30-75 years, M/W, generally healthy       | 1 436/<br>3 346 752<br>person-years          | Self-report, death report, national death index, medical records reviewed by | In both cohorts, weight and height were self-reported at baseline                                             | BMI      | Incidence, colorectal cancer | Age, alcohol consumption, calcium intake, diet quality score, endoscopy, family history of colorectal cancer, folate, history of diabetes,                                                                                                                                             |

|                    | adults                                                                                   |                                                    | physicians                                                                      |                                                                                                                                                                                                                                               |                             |                                    | HRT use, multivitamin use, nsaid use, pack-years of cigarette smoking, physical activity, red and processed meat, regular aspirin use, total energy intake                                                                                                                        |
|--------------------|------------------------------------------------------------------------------------------|----------------------------------------------------|---------------------------------------------------------------------------------|-----------------------------------------------------------------------------------------------------------------------------------------------------------------------------------------------------------------------------------------------|-----------------------------|------------------------------------|-----------------------------------------------------------------------------------------------------------------------------------------------------------------------------------------------------------------------------------------------------------------------------------|
| Liu, 2016<br>China | SWHS,<br>Prospective Cohort,<br>Age: 40-70 years,<br>W                                   | 870/<br>68 253<br>15.1 years                       | Cancer registry,<br>follow up by home<br>visit, medical and<br>hospital records | All participants<br>were asked to wear<br>lightweight indoor<br>clothing and were<br>measured for<br>weight, height and<br>circumferences of<br>the waist and hips<br>by trained<br>interviewers, who<br>were retired health<br>professionals | BMI                         | Incidence,<br>colorectal<br>cancer | Alcohol consumption,<br>educational level, family<br>history of cancer, fruits and<br>vegetables consumption,<br>hormone replacement therapy,<br>leisure time physical activity,<br>meat intake, menopausal<br>status, parity, total energy<br>intake, spouse smoking<br>exposure |
|                    |                                                                                          | 551                                                |                                                                                 |                                                                                                                                                                                                                                               |                             | Incidence,<br>colon cancer         |                                                                                                                                                                                                                                                                                   |
|                    |                                                                                          | 319                                                |                                                                                 |                                                                                                                                                                                                                                               |                             | Incidence,<br>rectal cancer        |                                                                                                                                                                                                                                                                                   |
|                    |                                                                                          | 870                                                |                                                                                 |                                                                                                                                                                                                                                               | Waist-to-hip<br>ratio       | Incidence,<br>colorectal<br>cancer |                                                                                                                                                                                                                                                                                   |
|                    |                                                                                          | 551                                                |                                                                                 |                                                                                                                                                                                                                                               |                             | Incidence,<br>colon cancer         |                                                                                                                                                                                                                                                                                   |
|                    |                                                                                          | 319                                                |                                                                                 |                                                                                                                                                                                                                                               |                             | Incidence,<br>rectal cancer        |                                                                                                                                                                                                                                                                                   |
| Song, 2016<br>USA  | NHS-HPFS,<br>Prospective Cohort,<br>Age: 30-75 years,<br>M/W,<br>Health<br>professionals | 1 125/<br>112 610<br>1 979 428<br>person-<br>years | Self-report, next of<br>kin, medical and<br>pathological<br>records             | Self-reported via<br>questionnaire                                                                                                                                                                                                            | BMI                         | Incidence,<br>colorectal<br>cancer | Age, alcohol, calcium intake,<br>calendar year, diet quality,<br>endoscopy, family history of<br>colorectal cancer, height,<br>multivitamin, NSAID use,<br>pack-years of smoking,<br>physical activity                                                                            |
|                    |                                                                                          | 1 884                                              |                                                                                 |                                                                                                                                                                                                                                               |                             | Waist-<br>circumference            |                                                                                                                                                                                                                                                                                   |
|                    |                                                                                          | 1 365                                              |                                                                                 |                                                                                                                                                                                                                                               | Incidence,<br>colon cancer  |                                    |                                                                                                                                                                                                                                                                                   |
|                    |                                                                                          | 401                                                |                                                                                 |                                                                                                                                                                                                                                               | Incidence,<br>rectal cancer |                                    |                                                                                                                                                                                                                                                                                   |
|                    |                                                                                          | 1 877                                              |                                                                                 |                                                                                                                                                                                                                                               | Waist-to-hip<br>ratio       | Incidence,<br>colorectal<br>cancer |                                                                                                                                                                                                                                                                                   |
|                    |                                                                                          | 1 361                                              |                                                                                 |                                                                                                                                                                                                                                               |                             | Incidence,<br>colon cancer         |                                                                                                                                                                                                                                                                                   |
|                    |                                                                                          | 399                                                |                                                                                 |                                                                                                                                                                                                                                               |                             | Incidence,<br>rectal cancer        |                                                                                                                                                                                                                                                                                   |
| Bhaskaran, 2014    | CPRD,                                                                                    | 13 465/                                            | Medical records                                                                 | Weight and height                                                                                                                                                                                                                             | BMI                         | Incidence,                         | Age, sex, diabetes, socio-                                                                                                                                                                                                                                                        |

|                       |                                                                               |                                 |                                                                     |                                                                              |        |                                           |                                                                                                                                            |
|-----------------------|-------------------------------------------------------------------------------|---------------------------------|---------------------------------------------------------------------|------------------------------------------------------------------------------|--------|-------------------------------------------|--------------------------------------------------------------------------------------------------------------------------------------------|
| UK                    | Prospective Cohort,<br>Age: 16- years,<br>M/W                                 | 5 243 978<br>25 years           |                                                                     | were measured                                                                |        | colon cancer                              | economic status, alcohol,<br>calendar year                                                                                                 |
|                       |                                                                               | 6 123/                          |                                                                     |                                                                              |        | Incidence,<br>rectal cancer               |                                                                                                                                            |
| Guo, 2014<br>China    | Northern China<br>2006-2011,<br>Prospective Cohort,<br>Age: 18- years,<br>M/W | 149/<br>133 273<br>4.28 years   | Self-report, next of<br>kin, medical and<br>pathological<br>records | Weight and height<br>were measured                                           | BMI    | Incidence,<br>colorectal<br>cancer        | Age, alcohol consumption,<br>education level, smoking                                                                                      |
|                       |                                                                               | 62/                             |                                                                     |                                                                              |        | Incidence,<br>colon cancer                |                                                                                                                                            |
|                       |                                                                               | 86/                             |                                                                     |                                                                              |        | Incidence,<br>rectal cancer               |                                                                                                                                            |
| Wie, 2014<br>Korea    | Korea 2004-2008,<br>Prospective Cohort,<br>M/W                                | 53/<br>8024<br>7 years          | Cancer registry and<br>medical records                              | Weight and height<br>were measured                                           | BMI    | Incidence,<br>colorectal<br>cancer        | Age, sex, energy intake,<br>smoking, physical activity,<br>alcohol use, income, education<br>and marital status                            |
| Song, 2014<br>Finland | FINRISK,<br>Prospective Cohort,<br>Age: 24-74 years,<br>M/W                   | 203/<br>54 725<br>20.6 years    | Cancer and<br>mortality registries                                  | Height and weight<br>were measured on<br>site by specially<br>trained nurses | BMI    | Incidence<br>colon cancer,<br>men         | Age, leisure - physical<br>activity, area, education,<br>smoking                                                                           |
|                       |                                                                               | 184/                            |                                                                     |                                                                              |        | Colon, women                              |                                                                                                                                            |
|                       |                                                                               | 203/<br>184/                    |                                                                     |                                                                              |        | Incidence<br>rectum, men                  |                                                                                                                                            |
|                       |                                                                               | 103/                            |                                                                     |                                                                              |        | Incidence<br>rectum, women                |                                                                                                                                            |
| Boursi, 2014<br>UK    | THIN,<br>Nested Case<br>Control,<br>Age: 40- years,<br>M/W                    | 5 617/<br>15122<br>controls     | Medical records                                                     |                                                                              | Height | Incidence,<br>colorectal<br>cancer, men   | Alcohol, BMI, colonoscopy,<br>connective tissues disease,<br>diabetes, heart disease,<br>NSAID use, smoking                                |
|                       |                                                                               | 4 361/<br>11725<br>controls     |                                                                     |                                                                              |        | Incidence,<br>colorectal<br>cancer, women |                                                                                                                                            |
| Kabat, 2014<br>USA    | NIH-AARP,<br>Prospective Cohort,<br>Age: 50-71 years,<br>M/W,<br>Retired      | 1 311/<br>481 197<br>10.5 years | Cancer registry and<br>national death<br>Index                      | Self-reported height                                                         | Height | Incidence,<br>colon cancer,<br>women      | Age, age at menarche, alcohol,<br>BMI, colonoscopy,<br>educational level, family<br>history of cancer, physical<br>activity, race, smoking |
|                       |                                                                               | 2 860/                          |                                                                     |                                                                              |        | Incidence,<br>colon cancer,<br>men        |                                                                                                                                            |
|                       |                                                                               | 1 427/                          |                                                                     |                                                                              |        | Incidence,<br>rectal cancer,              |                                                                                                                                            |

|                       |                                                                           |                               |                                                                                                 |                                                                                        |                       |                                         |                                                                                                                                                           |
|-----------------------|---------------------------------------------------------------------------|-------------------------------|-------------------------------------------------------------------------------------------------|----------------------------------------------------------------------------------------|-----------------------|-----------------------------------------|-----------------------------------------------------------------------------------------------------------------------------------------------------------|
|                       |                                                                           | 591/                          |                                                                                                 |                                                                                        |                       | men                                     |                                                                                                                                                           |
|                       |                                                                           |                               |                                                                                                 |                                                                                        |                       | Incidence, rectal cancer, women         |                                                                                                                                                           |
| Kabat, 2013<br>USA    | WHI,<br>Prospective Cohort,<br>Age: 50-79 years,<br>W,<br>Post-menopausal | 166/<br>11 124<br>12.9 years  | Self-report verified<br>by reviewing<br>medical and<br>pathological<br>records by<br>physicians | Weight, height, and<br>waist and hip<br>circumferences<br>measured by trained<br>staff | BMI                   | Incidence,<br>colorectal<br>cancer      | Diabetes, ethnicity, HRT use,<br>physical activity, alcohol,<br>education, family history<br>colorectal cancer, pack years<br>smoking randomisation group |
|                       |                                                                           | Waist-<br>circumference       |                                                                                                 |                                                                                        |                       |                                         |                                                                                                                                                           |
|                       |                                                                           |                               |                                                                                                 |                                                                                        | Waist to hip<br>ratio |                                         |                                                                                                                                                           |
|                       |                                                                           |                               |                                                                                                 |                                                                                        |                       |                                         |                                                                                                                                                           |
|                       |                                                                           | 1 516/<br>144 701<br>12 years |                                                                                                 |                                                                                        | Height                |                                         |                                                                                                                                                           |
|                       |                                                                           | 1 904/<br>144 701<br>12 years |                                                                                                 |                                                                                        |                       | Incidence,<br>colon cancer              |                                                                                                                                                           |
|                       |                                                                           | 257/<br>481 197<br>10.5 years |                                                                                                 |                                                                                        |                       | Incidence,<br>rectal cancer             |                                                                                                                                                           |
| Kitahara, 2013<br>USA | PLCO,<br>Prospective Cohort,<br>Age: 55-74 years,<br>M/W                  | 962/<br>74 474<br>11.9 years  | Self-reported/death<br>certificate/ medical<br>records                                          | Questionnaire                                                                          | BMI                   | Incidence,<br>colorectal<br>cancer, all | Sex, HRT use, race, study<br>centre, age at baseline,<br>screening, smoking                                                                               |
|                       |                                                                           | 546/                          |                                                                                                 |                                                                                        |                       | Colorectal,<br>men                      |                                                                                                                                                           |
|                       |                                                                           | 416/                          |                                                                                                 |                                                                                        |                       | Colorectal,<br>women                    |                                                                                                                                                           |
|                       |                                                                           | 529/                          |                                                                                                 |                                                                                        |                       | Proximal colon,<br>all                  |                                                                                                                                                           |
|                       |                                                                           | 275/                          |                                                                                                 |                                                                                        |                       | Proximal colon,<br>men                  |                                                                                                                                                           |
|                       |                                                                           | 254/                          |                                                                                                 |                                                                                        |                       | Proximal colon,<br>women                |                                                                                                                                                           |
|                       |                                                                           | 219/                          |                                                                                                 |                                                                                        |                       | Distal colon, all                       |                                                                                                                                                           |

|                       |                                                                                                                                   |                                                                                |                                                                                                           |                                                                 |        |                                                                                             |                                                                                                                                                                                      |
|-----------------------|-----------------------------------------------------------------------------------------------------------------------------------|--------------------------------------------------------------------------------|-----------------------------------------------------------------------------------------------------------|-----------------------------------------------------------------|--------|---------------------------------------------------------------------------------------------|--------------------------------------------------------------------------------------------------------------------------------------------------------------------------------------|
|                       |                                                                                                                                   | 131/<br>85/<br>200/<br>134/<br>66/                                             |                                                                                                           |                                                                 |        | Distal colon, men<br>Distal colon, women<br>Rectum, all<br>Rectum, men<br>Rectum, women     |                                                                                                                                                                                      |
| Morikawa, 2013<br>USA | NHS & HPFS, Pooled analysis, (W) nurses and (M) health professionals<br>NHS, Prospective Cohort, W<br>HPFS, Prospective Cohort, M | 861/<br>156 703<br>2 631 423 person-years<br>493/<br>109 046<br>368/<br>47 684 | Self-report (provided evidence of treatment), medical records and pathology reports, national death Index | Weight measured, height was self-reported in 1976               | BMI    | Incidence, colorectal cancer                                                                | Age, aspirin, calcium, caloric intake, folate, red meat, vit D, multivitamin, smoking status, alcohol, family history CRC, sigmoidoscopy, physical activity smoking, HRT use (women) |
| Poynter, 2013<br>USA  | IWHS, Prospective Cohort, Age: 55-71 years, W, Post-menopausal                                                                    | 707/<br>37 459<br>22 years<br>604/                                             | SEER                                                                                                      | BMI was calculated from self-reported current weight and height | BMI    | Incidence, colon cancer, aged $\geq 75$ years<br>Incidence, colon cancer, aged $< 75$ years | Estrogen use, physical activity, age at baseline, smoking                                                                                                                            |
| Kabat, 2013<br>Canada | CNBSS, Prospective Cohort, Age: 40-59 years, W                                                                                    | 1 096/<br>88 256<br>16.2 years<br>769/<br>338/                                 | Record linkages to cancer database and to the national mortality database                                 | Height and weight measured at the Initial examination.          | Height | Incidence, colorectal cancer<br>Incidence, colon cancer<br>Incidence, rectal cancer         | Age, BMI, hormone replacement therapy, menopausal status, oral contraceptive use, pack years of smoking, years of education                                                          |
| Walter, 2013<br>USA   | VITAL, Prospective Cohort, Age: 50-76 years, M/W                                                                                  | 491/<br>65 038<br>7.3 years                                                    | Cancer registry                                                                                           | Questionnaire                                                   | Height | Incidence, colorectal cancer                                                                | Age, sex, race                                                                                                                                                                       |
| Morikawa, 2013<br>USA | NHS & HPFS, Pooled analysis, (W) nurses and (M) health                                                                            | 861/<br>156 703<br>2 631 423 person-                                           | Self-report (provided evidence of treatment), medical records and                                         | Weight measured, height was self-reported in 1976               | BMI    | Incidence, colorectal cancer                                                                | Age, aspirin, calcium, caloric intake, folate, red meat, vit D, multivitamin, smoking status, alcohol, family history CRC,                                                           |

|                      |                                                              |                   |                                                                     |                                                                                                                   |     |                                             |                                                                                                                                                                                                                                 |
|----------------------|--------------------------------------------------------------|-------------------|---------------------------------------------------------------------|-------------------------------------------------------------------------------------------------------------------|-----|---------------------------------------------|---------------------------------------------------------------------------------------------------------------------------------------------------------------------------------------------------------------------------------|
|                      | professionals                                                | years             | pathology reports,<br>national death<br>Index                       |                                                                                                                   |     |                                             | sigmoidoscopy, physical<br>activity smoking, HRT use<br>(women)                                                                                                                                                                 |
|                      | NHS,<br>Prospective Cohort,<br>W                             | 493/<br>109 046   |                                                                     |                                                                                                                   |     |                                             |                                                                                                                                                                                                                                 |
|                      | HPFS,<br>Prospective Cohort,<br>M                            | 368/<br>47 684    |                                                                     |                                                                                                                   |     |                                             |                                                                                                                                                                                                                                 |
| Li, 2012<br>China    | SWHS,<br>Prospective Cohort,<br>Age: 40-70 years,<br>W       | 621/<br>72 972    | Follow up<br>survey/cancer<br>registry/vital<br>statistics registry | Anthropometric<br>measurements,<br>measured by trained<br>Interviewers at<br>baseline                             | BMI | Incidence,<br>colorectal<br>cancer          | Alcohol consumption, energy<br>intake, fruit, Income,<br>menopausal status, physical<br>activity, tea consumption, age<br>at baseline, cigarette,<br>education, family history of<br>colorectal cancer, red meat,<br>vegetables |
|                      |                                                              | 381/<br>240/      |                                                                     |                                                                                                                   |     | Incidence,<br>colon cancer                  |                                                                                                                                                                                                                                 |
|                      |                                                              |                   |                                                                     |                                                                                                                   |     | Incidence,<br>rectal cancer                 |                                                                                                                                                                                                                                 |
| Li, 2012<br>China    | SMHS,<br>Prospective Cohort,<br>Age: 40-74 years,<br>M       | 313/<br>61 283    | Follow up<br>survey/cancer<br>registry/vital<br>statistics registry | Anthropometric<br>measurements,<br>measured by trained<br>Interviewers at<br>baseline                             | BMI | Incidence,<br>colorectal<br>cancer          | Alcohol consumption, energy<br>intake, fruits, Income, physical<br>activity, tea consumption, age<br>at baseline, education, family<br>history of colorectal cancer,<br>pack years of smoking, red<br>meat, vegetables          |
|                      |                                                              | 180/<br>133/      |                                                                     |                                                                                                                   |     | Incidence,<br>colon cancer                  |                                                                                                                                                                                                                                 |
|                      |                                                              |                   |                                                                     |                                                                                                                   |     | Incidence,<br>rectal cancer                 |                                                                                                                                                                                                                                 |
| Renehan, 2012<br>USA | NIH-AARP,<br>Prospective Cohort,<br>Age: 50-71 years,<br>M/W | 4 076/<br>273 679 | Cancer registry                                                     | Assessed by<br>questionnaire,<br>recalled weights at<br>ages 18, 35, and 50<br>years and self-<br>reported height | BMI | Incidence,<br>colorectal<br>cancer, men     | Age, physical activity, race,<br>alcohol, education, smoking,<br>alcohol consumption,<br>HRT use (in women)                                                                                                                     |
|                      |                                                              | 2 804/<br>1 240/  |                                                                     |                                                                                                                   |     | Incidence,<br>colorectal<br>cancer, women   |                                                                                                                                                                                                                                 |
|                      |                                                              | 2 070/<br>1 145/  |                                                                     |                                                                                                                   |     | Incidence,<br>colon cancer,<br>men          |                                                                                                                                                                                                                                 |
|                      |                                                              |                   |                                                                     |                                                                                                                   |     | Incidence,<br>proximal colon<br>cancer, men |                                                                                                                                                                                                                                 |
|                      |                                                              |                   |                                                                     |                                                                                                                   |     |                                             |                                                                                                                                                                                                                                 |

|                             |                                                          |                                 |                 |                                    |     |                                         |                                                                                                                         |
|-----------------------------|----------------------------------------------------------|---------------------------------|-----------------|------------------------------------|-----|-----------------------------------------|-------------------------------------------------------------------------------------------------------------------------|
|                             |                                                          | 855/                            |                 |                                    |     | Incidence, distal colon cancer, men     |                                                                                                                         |
|                             |                                                          | 962/                            |                 |                                    |     | Incidence, colon cancer, women          |                                                                                                                         |
|                             |                                                          | 607/                            |                 |                                    |     | Incidence, proximal colon cancer, women |                                                                                                                         |
|                             |                                                          | 329/                            |                 |                                    |     | Incidence, distal colon cancer, women   |                                                                                                                         |
|                             |                                                          | 762/                            |                 |                                    |     | Incidence, rectal cancer, men           |                                                                                                                         |
|                             |                                                          | 282/                            |                 |                                    |     | Incidence, rectal cancer, women         |                                                                                                                         |
| Hughes, 2011<br>Netherlands | NLCS,<br>Prospective Cohort,<br>Age: 55-69 years,<br>M/W | 1 211/<br>120 852<br>16.3 years | Cancer registry | Self-reported height<br>and weight | BMI | Incidence, colorectal cancer, men       | Age, alcohol consumption, energy intake, occupational activity, education, family history of colorectal cancer, smoking |
|                             |                                                          | 1 211/<br>1 106/                |                 |                                    |     | Incidence, colorectal cancer, women     |                                                                                                                         |
|                             |                                                          | 327/                            |                 |                                    |     | Incidence, proximal colon cancer, men   |                                                                                                                         |
|                             |                                                          | 427                             |                 |                                    |     | Incidence, distal colon cancer, men     |                                                                                                                         |
|                             |                                                          | 459/                            |                 |                                    |     | Incidence, proximal colon cancer, women |                                                                                                                         |
|                             |                                                          | 327/                            |                 |                                    |     | Incidence, distal colon cancer, women   |                                                                                                                         |
|                             |                                                          |                                 |                 |                                    |     |                                         |                                                                                                                         |

|                          |                                                                     |                          |                                                              |                                 |                                |                                                         |                                                                                                                                                                |
|--------------------------|---------------------------------------------------------------------|--------------------------|--------------------------------------------------------------|---------------------------------|--------------------------------|---------------------------------------------------------|----------------------------------------------------------------------------------------------------------------------------------------------------------------|
|                          |                                                                     | 299/                     |                                                              |                                 |                                | Incidence, rectal cancer, men                           |                                                                                                                                                                |
|                          |                                                                     | 205/                     |                                                              |                                 |                                | Incidence, rectal cancer, women                         |                                                                                                                                                                |
| Odegaard, 2011 Singapore | SCHS, Prospective Cohort, Age: 45-74 years, M/W, middle-aged adults | 980/51 251<br>11.5 years | Cancer registry and death registry                           | Self-reported height and weight | BMI                            | Incidence, colorectal cancer                            | Age, sex, diabetes, dialect group, dietary pattern score, family history of cancer, physical activity, sleep, alcohol intake, education, energy, smoking, year |
|                          |                                                                     | 596/                     |                                                              |                                 |                                | Incidence, colon cancer                                 |                                                                                                                                                                |
|                          |                                                                     | 384/                     |                                                              |                                 |                                | Incidence, rectal cancer                                |                                                                                                                                                                |
| Park, 2011 UK            | EPIC-Norfolk, Prospective Cohort, Age: 40-79 years, M/W             | 357/20 608<br>11 years   | Record linkage to cancer registration and death certificates | Self-reported and measured      | BMI<br><br>Waist-circumference | Incidence, colorectal cancer, men (measured BMI)        | Age, sex, smoking, alcohol, education, exercise, family history of CRC, energy intake, folate, fibre, total meat and processed meat, intakes                   |
|                          |                                                                     |                          |                                                              |                                 |                                | Incidence, colorectal cancer, men (self-reported BMI)   |                                                                                                                                                                |
|                          |                                                                     |                          |                                                              |                                 |                                | Incidence, colorectal cancer, women (measured BMI)      |                                                                                                                                                                |
|                          |                                                                     |                          |                                                              |                                 |                                | Incidence, colorectal cancer, women (self-reported BMI) |                                                                                                                                                                |
|                          |                                                                     |                          |                                                              |                                 |                                | Men (measured BMI)                                      | Age, sex, s moking, alcohol, education, exercise, family history of CRC, energy intake, folate,                                                                |



|                             |                                                                                 |                              |                                       |                                    |     |                                                      |                                                                                                                                                                               |
|-----------------------------|---------------------------------------------------------------------------------|------------------------------|---------------------------------------|------------------------------------|-----|------------------------------------------------------|-------------------------------------------------------------------------------------------------------------------------------------------------------------------------------|
|                             |                                                                                 |                              |                                       |                                    |     | Men<br>(self-reported<br>BMI)                        | fibre, total meat and processed<br>meat, intakes, waist and hip<br>circumferences                                                                                             |
|                             |                                                                                 |                              |                                       |                                    |     | Women<br>(measured<br>BMI)                           |                                                                                                                                                                               |
|                             |                                                                                 |                              |                                       |                                    |     | Women<br>(self-reported<br>BMI)                      |                                                                                                                                                                               |
| Odegaard, 2011<br>Singapore | SCHS,<br>Prospective Cohort,<br>Age: 45-74 years,<br>M/W,<br>middle-aged adults | 980/<br>51 251<br>11.5 years | Cancer registry and<br>death registry | Self-reported height<br>and weight | BMI | Incidence,<br>colorectal<br>cancer                   | Age, sex, diabetes, dialect<br>group, dietary pattern score,<br>family history of cancer,<br>physical activity, sleep,<br>alcohol intake, education,<br>energy, smoking, year |
|                             |                                                                                 | 596/                         |                                       |                                    |     | Incidence,<br>colon cancer                           |                                                                                                                                                                               |
|                             |                                                                                 | 384/                         |                                       |                                    |     | Incidence,<br>rectal cancer                          |                                                                                                                                                                               |
|                             |                                                                                 | 589/                         |                                       |                                    |     | Incidence,<br>colorectal<br>cancer, never<br>smokers |                                                                                                                                                                               |
|                             |                                                                                 |                              |                                       |                                    |     | Ever smokers                                         |                                                                                                                                                                               |
|                             |                                                                                 | 391/                         |                                       |                                    |     | Incidence,<br>colon cancer,<br>never smokers         |                                                                                                                                                                               |
|                             |                                                                                 | 205/                         |                                       |                                    |     | Incidence,<br>colon cancer,<br>ever smokers          |                                                                                                                                                                               |
|                             |                                                                                 | 198/                         |                                       |                                    |     | Incidence,<br>rectal cancer,<br>never smokers        |                                                                                                                                                                               |
|                             |                                                                                 | 176/                         |                                       |                                    |     | Ever smokers                                         |                                                                                                                                                                               |
| Matsuo, 2011<br>Japan       | Pooling analysis of<br>8 cohort studies in<br>Japan                             | 3 055                        |                                       |                                    | BMI | Incidence,<br>colorectal<br>cancer, men              |                                                                                                                                                                               |
|                             |                                                                                 | 1 924                        |                                       |                                    |     | Incidence,<br>colorectal<br>cancer, women            |                                                                                                                                                                               |
|                             |                                                                                 | 1 919                        |                                       |                                    |     | Incidence,<br>colon cancer,                          |                                                                                                                                                                               |

|                          |                                                 |                                  |                 |                          |        |                                         |                                                                                                                                         |
|--------------------------|-------------------------------------------------|----------------------------------|-----------------|--------------------------|--------|-----------------------------------------|-----------------------------------------------------------------------------------------------------------------------------------------|
|                          |                                                 | 1 534                            |                 |                          |        | men                                     |                                                                                                                                         |
|                          |                                                 | 1 111                            |                 |                          |        | Incidence, colon cancer, women          |                                                                                                                                         |
|                          |                                                 | 735                              |                 |                          |        | Incidence, rectal cancer, men           |                                                                                                                                         |
|                          |                                                 |                                  |                 |                          |        | Incidence, rectal cancer, women         |                                                                                                                                         |
| Green, 2011 UK           | MWS, Prospective Cohort, Age: 56 years, W       | 6 281/<br>1 297 124<br>9.4 years | Cancer registry | Questionnaire            | Height | Incidence, colon cancer                 | Age, age at first child birth, age at menarche, alcohol, BMI, parity, region, smoking, socio-economic status, strenuous exercise        |
| Hughes, 2011 Netherlands | NLCS, Prospective Cohort, Age: 55-69 years, M/W | 1 211/<br>120 852<br>16.3 years  | Cancer registry | Self-reported height and | Height | Incidence, colorectal cancer, men       | Age, alcohol consumption, educational level, energy intake, family history of colorectal cancer, occupational activity, smoking, weight |
|                          |                                                 | 1 211/                           |                 |                          |        | Incidence, colorectal cancer, men       |                                                                                                                                         |
|                          |                                                 | 1 106/                           |                 |                          |        | Incidence, colorectal cancer, women     |                                                                                                                                         |
|                          |                                                 | 1 106/                           |                 |                          |        | Incidence, colorectal cancer, women     |                                                                                                                                         |
|                          |                                                 | 459/                             |                 |                          |        | Incidence, proximal colon cancer, women |                                                                                                                                         |
|                          |                                                 | 459/                             |                 |                          |        | Incidence, proximal colon cancer, women |                                                                                                                                         |
|                          |                                                 | 427/                             |                 |                          |        | Incidence, distal colon cancer, men     |                                                                                                                                         |
|                          |                                                 | 427/                             |                 |                          |        | Incidence, distal colon cancer, men     |                                                                                                                                         |
|                          |                                                 | 327/                             |                 |                          |        | Incidence, proximal colon               |                                                                                                                                         |

|                         |                                                      |                                             |                 |                                             |                                                                        |                                                                                                                      |                                                                                                                                                                                                                            |
|-------------------------|------------------------------------------------------|---------------------------------------------|-----------------|---------------------------------------------|------------------------------------------------------------------------|----------------------------------------------------------------------------------------------------------------------|----------------------------------------------------------------------------------------------------------------------------------------------------------------------------------------------------------------------------|
|                         |                                                      | 327/                                        |                 |                                             |                                                                        | cancer, men                                                                                                          |                                                                                                                                                                                                                            |
|                         |                                                      | 327/                                        |                 |                                             |                                                                        | Incidence, proximal colon cancer, men                                                                                |                                                                                                                                                                                                                            |
|                         |                                                      | 327/                                        |                 |                                             |                                                                        | Incidence, distal colon cancer, women                                                                                |                                                                                                                                                                                                                            |
|                         |                                                      | 327/                                        |                 |                                             |                                                                        | Incidence, distal colon cancer, women                                                                                |                                                                                                                                                                                                                            |
| Oxentenko, 2010 USA     | IWHS, Prospective Cohort, Age: 55-69 years, W        | 1 464/<br>36 941<br>619 961<br>person-years | SEER            | Self-reported height and weight at baseline | BMI<br><br>Waist-circumference<br><br>Waist to hip ratio<br><br>Weight | Incidence, colorectal cancer<br><br>Incidence, proximal colorectal cancer<br><br>Incidence, distal colorectal cancer | Age, age at menopause, calcium, contraception, diabetes, energy intake, estrogen use, folate, smoking status, total fat, vitamin E, alcohol, cigarette consumption, fruit and vegetable, physical activity level, red meat |
|                         |                                                      | 771/                                        |                 |                                             |                                                                        |                                                                                                                      |                                                                                                                                                                                                                            |
|                         |                                                      | 660/                                        |                 |                                             |                                                                        |                                                                                                                      |                                                                                                                                                                                                                            |
|                         |                                                      | 1 464/<br>36 941<br>619 961<br>person-years |                 |                                             | Height                                                                 | Incidence, colorectal cancer                                                                                         |                                                                                                                                                                                                                            |
| Yamamoto, 2010 Japan    | HHCCS, Nested case-control study, Age: 54 years, M/W | 22 cases/<br>69 controls<br>3 years         | Histology       | Measured height and weight                  | BMI<br><br>Waist-circumference                                         | Incidence, colorectal cancer                                                                                         | Age, sex, alcohol consumption, smoking status, year of examination                                                                                                                                                         |
| Bassett, 2010 Australia | MCCS, Prospective Cohort, Age: 40-69 years, M/W      | 569/<br>41 154<br>14 years                  | Cancer registry | Self-reported                               | BMI<br><br>Weight                                                      | Incidence, colon cancer, women<br><br>Incidence, colon cancer, men                                                   | Country of birth, energy intake, fat intake, fruit and vegetable consumption, education, processed and red meat, smoking                                                                                                   |
|                         |                                                      | 292/                                        |                 |                                             |                                                                        |                                                                                                                      |                                                                                                                                                                                                                            |
|                         |                                                      | 277/                                        |                 |                                             |                                                                        |                                                                                                                      |                                                                                                                                                                                                                            |
| Laake, 2010             | NCS,                                                 | 450/                                        | Cancer registry | Height and weight                           | BMI                                                                    | Incidence,                                                                                                           | Age, area of residence,                                                                                                                                                                                                    |

|                       |                                                                                   |                                   |                                                                                                         |                                                                                                |        |                                                           |                                                                                                                  |
|-----------------------|-----------------------------------------------------------------------------------|-----------------------------------|---------------------------------------------------------------------------------------------------------|------------------------------------------------------------------------------------------------|--------|-----------------------------------------------------------|------------------------------------------------------------------------------------------------------------------|
| Norway                | Prospective Cohort,<br>Age: 20-49 years,<br>M/W,<br>Screening Program             | 76 179<br>23.2 years              |                                                                                                         | was measured at<br>examinations up to<br>three times between<br>1974 and 1988                  |        | colon cancer,<br>men                                      | educational level, energy<br>intake, height, physical<br>activity, smoking status                                |
|                       |                                                                                   | 419/                              |                                                                                                         |                                                                                                |        | Incidence,<br>colon cancer,<br>women                      |                                                                                                                  |
|                       |                                                                                   | 228/                              |                                                                                                         |                                                                                                |        | Incidence,<br>proximal colon<br>cancer, men               |                                                                                                                  |
|                       |                                                                                   | 174/                              |                                                                                                         |                                                                                                |        | Incidence,<br>distal colon<br>cancer, men                 |                                                                                                                  |
|                       |                                                                                   | 237/                              |                                                                                                         |                                                                                                |        | Incidence,<br>proximal colon<br>cancer, women             |                                                                                                                  |
|                       |                                                                                   | 159/                              |                                                                                                         |                                                                                                |        | Incidence,<br>distal colon<br>cancer, women               |                                                                                                                  |
| Prentice, 2009<br>USA | WHI<br>Prospective Cohort,<br>Age: 50-79 years,<br>W,<br>postmenopausal<br>women  | 363/<br>80 816<br>11 years<br>87/ | Self-report, medical<br>record and<br>pathology report<br>reviewed by<br>centrally trained<br>physician |                                                                                                | BMI    | Incidence,<br>colon cancer<br>Incidence,<br>rectal cancer | Age, family history of colon<br>cancer, physical activity,<br>smoking status, alcohol, total<br>energy intake    |
| Sung, 2009<br>Korea   | KNHIC,<br>Prospective Cohort,<br>Age: 40-64 years,<br>M/W,<br>middle-class adults | 2 499/<br>788 789<br>8.72 years   | Cancer registry and<br>death records                                                                    | Weight and height<br>were measured                                                             | Height | Incidence,<br>colon cancer,<br>men                        | Age, alcohol consumption,<br>area of residence, BMI,<br>occupation, physical activity,<br>salary, smoking habits |
|                       |                                                                                   | 1007/                             |                                                                                                         |                                                                                                |        | Incidence,<br>colon cancer,<br>women                      |                                                                                                                  |
|                       |                                                                                   | 2281/                             |                                                                                                         |                                                                                                |        | Incidence,<br>rectal cancer,<br>men                       |                                                                                                                  |
|                       |                                                                                   | 892/                              |                                                                                                         |                                                                                                |        | Incidence,<br>rectal cancer,<br>women                     |                                                                                                                  |
| Jee, 2008<br>Korea    | KNHIC,<br>Prospective Cohort,<br>Age: 30-95 years,<br>M/W                         | 4 671/<br>1 213 829<br>10.8 years | National cancer<br>registries,<br>hospitalisation<br>records and<br>admission files                     | Weight and height<br>measurements were<br>recorded during<br>health examination<br>at hospital | BMI    | Incidence,<br>colon cancer,<br>men                        | Age, smoking status                                                                                              |
|                       |                                                                                   | 4 032/                            |                                                                                                         |                                                                                                |        | Incidence,<br>rectum cancer,<br>men                       |                                                                                                                  |

|                       |                                                                             |                                                                    |                                                                                                         |                                         |                                |                                                                                                                                                                                                                                                    |                                                                                                                                                                                                                                                                                    |
|-----------------------|-----------------------------------------------------------------------------|--------------------------------------------------------------------|---------------------------------------------------------------------------------------------------------|-----------------------------------------|--------------------------------|----------------------------------------------------------------------------------------------------------------------------------------------------------------------------------------------------------------------------------------------------|------------------------------------------------------------------------------------------------------------------------------------------------------------------------------------------------------------------------------------------------------------------------------------|
|                       |                                                                             | 1 959/<br>1 681/                                                   |                                                                                                         |                                         |                                | Incidence,<br>colon cancer,<br>women<br>Incidence,<br>rectum cancer,<br>women                                                                                                                                                                      |                                                                                                                                                                                                                                                                                    |
| Song, 2008<br>Korea   | KNHIC,<br>Prospective Cohort,<br>Age: 40-64 years,<br>W,<br>Post-menopausal | 453/<br>170 481<br>8.75 years                                      | Self-report, cancer<br>registry, death<br>report                                                        | Weights and<br>heights were<br>measured | BMI                            | Incidence,<br>colon cancer                                                                                                                                                                                                                         | Age, alcohol, height, physical<br>activity, smoking status, pay<br>level at study entry                                                                                                                                                                                            |
| Thygesen, 2008<br>USA | HPFS,<br>Prospective Cohort,<br>Age: 40-75 years,<br>M                      | 693/<br>46 349<br>18 years                                         | Self-report verified<br>by medical record                                                               | Self-reported data                      | BMI                            | Incidence,<br>colon cancer                                                                                                                                                                                                                         | Age, alcohol consumption,<br>aspirin use, intakes of calcium,<br>energy, folate, methionine,<br>and multivitamin, physical<br>activity, previous endoscopic<br>screening, processed meat, red<br>meat intake, smoking habits,<br>vitamin d, family history of<br>colorectal cancer |
| Wang, 2008<br>USA     | CPS II,<br>Prospective Cohort,<br>M/W                                       | 546/<br>95 151<br>7.7 years<br>407/<br>402/<br>314/<br>142/<br>93/ | Self-report,<br>pathology report,<br>national death<br>Index, death cert,<br>state cancer<br>registries | Self-reported<br>data                   | BMI<br>Waist-<br>circumference | Incidence,<br>colorectal<br>cancer, men<br>Incidence,<br>colorectal<br>cancer, Women<br>Incidence,<br>colon cancer,<br>men<br>Incidence,<br>colon cancer,<br>women<br>Incidence,<br>rectal cancer,<br>men<br>Incidence,<br>rectal cancer,<br>women | Age, alcohol, educational<br>level, height, history of<br>endoscopy, multivitamin use,<br>NSAID use, physical activity,<br>smoking status<br>HRT use, Waist-<br>circumference                                                                                                      |
| Reeves, 2007<br>UK    | MWS,<br>Prospective Cohort,                                                 | 4 008/<br>1 222 630                                                | National health<br>records                                                                              | Self-reported                           | BMI                            | Incidence,<br>colorectal                                                                                                                                                                                                                           | Age, alcohol consumption,<br>geographical area, physical                                                                                                                                                                                                                           |

|                         |                                                                 |                                         |                 |                              |                                                        |                                                                                                                                   |                                                                       |                                                                                 |
|-------------------------|-----------------------------------------------------------------|-----------------------------------------|-----------------|------------------------------|--------------------------------------------------------|-----------------------------------------------------------------------------------------------------------------------------------|-----------------------------------------------------------------------|---------------------------------------------------------------------------------|
|                         | Age: 50-64 years,<br>W                                          | 5 years<br>1 884/<br>1 743/<br><br>136/ |                 |                              |                                                        | cancer<br>Never smoked<br>Postmenopausal never users of HRT<br><br>Incidence, colorectal cancer, premenopausal never users of HRT | activity, reproductive factors, smoking status, socio-economic status |                                                                                 |
| Bowers, 2006<br>Finland | ATBC,<br>Prospective Cohort,<br>Age: 58 years,<br>M,<br>Smokers | 410/<br>28 983<br>14.1 years<br>227/    | Cancer registry | Measured by<br>trained staff | BMI<br><br>Weight                                      | Incidence, colorectal cancer                                                                                                      | Age, no of cigarettes smoked                                          |                                                                                 |
|                         |                                                                 | 183/                                    |                 |                              |                                                        | Incidence, colon cancer                                                                                                           |                                                                       |                                                                                 |
|                         |                                                                 | 410/<br>28 983<br>14.1 years<br>227/    |                 |                              |                                                        | Incidence, rectal cancer                                                                                                          |                                                                       |                                                                                 |
|                         |                                                                 | 183/                                    |                 |                              |                                                        |                                                                                                                                   |                                                                       |                                                                                 |
|                         |                                                                 | 410/<br>28 983<br>14.1 years<br>227/    |                 |                              |                                                        | Incidence, colorectal cancer                                                                                                      |                                                                       | Age, number of cigarettes smoked, weight                                        |
|                         |                                                                 | 183/                                    |                 |                              |                                                        | Incidence, colon cancer                                                                                                           |                                                                       |                                                                                 |
|                         |                                                                 |                                         |                 |                              | Incidence, rectal cancer                               |                                                                                                                                   |                                                                       |                                                                                 |
|                         |                                                                 | Larsson, 2006<br>Sweden                 |                 |                              | COSM,<br>Prospective Cohort,<br>Age: 45-79 years,<br>M | 461/<br>45 906<br>7.1 years<br>284/                                                                                               | Cancer registry                                                       | Self-reported height and weight at age 20, weight and waist circum. at baseline |
| 180/                    | Incidence, colon cancer                                         |                                         |                 |                              |                                                        |                                                                                                                                   |                                                                       |                                                                                 |
| 129/                    | Incidence, rectum cancer                                        |                                         |                 |                              |                                                        |                                                                                                                                   |                                                                       |                                                                                 |
| 120/                    | Incidence, distal colon cancer                                  |                                         |                 |                              |                                                        |                                                                                                                                   |                                                                       |                                                                                 |
|                         | Incidence,                                                      |                                         |                 |                              |                                                        |                                                                                                                                   |                                                                       |                                                                                 |
|                         |                                                                 |                                         |                 |                              |                                                        |                                                                                                                                   |                                                                       |                                                                                 |

|                             |                                                           |                                            |                 |                                                   |                                             |                                         |                                                                               |
|-----------------------------|-----------------------------------------------------------|--------------------------------------------|-----------------|---------------------------------------------------|---------------------------------------------|-----------------------------------------|-------------------------------------------------------------------------------|
|                             |                                                           |                                            |                 |                                                   |                                             | proximal colon cancer                   |                                                                               |
| Lukanova, 2006<br>Sweden    | NSHDC,<br>Prospective Cohort,<br>Age: 29-61 years,<br>M/W | 136/<br>68 786<br>8.2 years                | Medical records | Weight and height<br>measured by nurse            | BMI                                         | Incidence,<br>colorectal<br>cancer, men | Age, smoking habits, calendar<br>year                                         |
|                             |                                                           | 108/                                       |                 |                                                   |                                             | Women                                   |                                                                               |
|                             |                                                           | 76/                                        |                 |                                                   |                                             | Incidence,<br>colon cancer,<br>women    |                                                                               |
|                             |                                                           | 73/                                        |                 |                                                   |                                             | Men                                     |                                                                               |
|                             |                                                           | 58/                                        |                 |                                                   |                                             | Incidence,<br>rectal cancer,<br>men     |                                                                               |
|                             |                                                           | 31/                                        |                 |                                                   |                                             | Women                                   |                                                                               |
| MacInnis, 2006<br>Australia | MCCS,<br>Prospective Cohort,<br>Age: 27-75 years,<br>W    | 117/<br>24 072<br>10.4 years               | Cancer registry | Height, weight,<br>waist and hip were<br>measured | BMI                                         | Incidence,<br>proximal colon<br>cancer  | Age-underlying cox models,<br>country of birth, educational<br>level, HRT use |
|                             |                                                           | 79/                                        |                 |                                                   | Waist-<br>circumference                     | Incidence,<br>distal colon<br>cancer    |                                                                               |
|                             |                                                           | 212/<br>24 072<br>10.4 years               |                 |                                                   | Weight<br>Height                            | Incidence,<br>colon cancer              |                                                                               |
| MacInnis, 2006<br>Australia | MCCS,<br>Prospective Cohort,<br>Age: 27-75 years,<br>M/W  | 229/<br>41 114<br>10.3<br>person-<br>years | Cancer registry | Measured                                          | BMI                                         | Incidence,<br>rectal cancer             | Age, sex, country of birth                                                    |
|                             |                                                           | 134/                                       |                 |                                                   | Weight                                      | Incidence,<br>rectal cancer ,<br>men    |                                                                               |
|                             |                                                           | 120/                                       |                 |                                                   | Incidence, stage<br>I/II rectal<br>cancer   |                                         |                                                                               |
|                             |                                                           | 102/                                       |                 |                                                   | Incidence, stage<br>III/iv rectal<br>cancer |                                         |                                                                               |

|                       |                                                 |                                              |                            |                              |                     |                                                                                              |                                                                                                                                                                                 |
|-----------------------|-------------------------------------------------|----------------------------------------------|----------------------------|------------------------------|---------------------|----------------------------------------------------------------------------------------------|---------------------------------------------------------------------------------------------------------------------------------------------------------------------------------|
|                       |                                                 | 95/<br>134/<br>95/                           |                            |                              |                     | Incidence, rectal cancer, women<br>Incidence, rectal cancer<br>Incidence, rectal cancer, men |                                                                                                                                                                                 |
| Pischoon, 2006 Europe | EPIC, Prospective Cohort, Age: 25-70 years, M/W | 563/<br>368 277<br>2 254 727<br>person-years | Population registries      | Self-reported questionnaires | BMI                 | Incidence, colon cancer, women                                                               | Alcohol consumption, centre, educational level, physical activity, smoking status, age at recruitment, fibre, fish and shellfish, fruits and vegetables, red and processed meat |
|                       |                                                 | 421/                                         |                            |                              | Waist-circumference | Incidence, colon cancer, men                                                                 |                                                                                                                                                                                 |
|                       |                                                 | 295/                                         |                            |                              | Waist to hip ratio  | Incidence, rectal cancer, men                                                                |                                                                                                                                                                                 |
|                       |                                                 | 291/                                         |                            |                              |                     | Incidence, rectal cancer, women                                                              |                                                                                                                                                                                 |
|                       |                                                 | 421/<br>368 277<br>2 254 727<br>person-years |                            |                              | Height              | Incidence, colon cancer, women                                                               |                                                                                                                                                                                 |
|                       |                                                 | 563/                                         |                            |                              |                     | Incidence, colon cancer, men                                                                 |                                                                                                                                                                                 |
|                       |                                                 | 295/                                         |                            |                              |                     | Incidence, rectal cancer, men                                                                |                                                                                                                                                                                 |
|                       |                                                 | 291/                                         |                            |                              |                     | Incidence, rectal cancer, women                                                              |                                                                                                                                                                                 |
|                       |                                                 |                                              |                            |                              |                     |                                                                                              |                                                                                                                                                                                 |
|                       |                                                 |                                              |                            |                              |                     |                                                                                              |                                                                                                                                                                                 |
| Samanic, 2006 Sweden  | SFOSHCIC, Historical Cohort,                    | 1 795/<br>362 552                            | Health screening programme | From health records          | BMI                 | Incidence, colon cancer                                                                      | Age, calendar year, smoking status                                                                                                                                              |



|                          |                                                                                                                |                                                                                       |                                                      |                                                   |     |                                                                                                                                                                                                                |                                                              |
|--------------------------|----------------------------------------------------------------------------------------------------------------|---------------------------------------------------------------------------------------|------------------------------------------------------|---------------------------------------------------|-----|----------------------------------------------------------------------------------------------------------------------------------------------------------------------------------------------------------------|--------------------------------------------------------------|
|                          | Age: 18-67 years,<br>M                                                                                         | 19 years<br>1 362/<br>379/                                                            |                                                      |                                                   |     | Incidence,<br>rectal cancer<br>Never smokers                                                                                                                                                                   |                                                              |
| Yeh, 2006<br>Taiwan      | Taiwan cohort,<br>Prospective Cohort,<br>Age: 30-65 years,<br>M/W                                              | 68/<br>23 943<br>10 years<br>39/                                                      | Cancer registry and<br>death certificates            | Height and weight<br>were measured                | BMI | Incidence,<br>colorectal<br>cancer, men<br>Incidence,<br>colorectal<br>cancer, women                                                                                                                           | Age, nutritional factors (nos),<br>residence, smoking status |
| Engeland, 2005<br>Norway | Norwegian<br>composite cohort<br>consisting of 3<br>groups,<br>Prospective Cohort,<br>Age: 20-74 years,<br>M/W | 24 130/<br>1 999 978<br>23 years<br>22 987/<br>16 638/<br>13 805/<br>9 182/<br>7 492/ | Health survey,<br>cancer registry,<br>death registry | Height and weight<br>measured by trained<br>staff | BMI | Incidence,<br>colorectal<br>cancer, women<br>Men<br>Incidence,<br>colon cancer,<br>women<br>Incidence,<br>colon cancer,<br>men<br>Incidence,<br>rectum cancer,<br>men<br>Incidence,<br>rectum cancer,<br>women | Age, birth cohort                                            |
| Rapp, 2005<br>Austria    | VHM&PP,<br>Prospective Cohort,<br>Age: 19-94 years,<br>M/W                                                     | 271/<br>1 450 000<br>person-<br>years<br>260/<br>138/<br>133/                         | Local physicians                                     | Recorded by<br>medical staff                      | BMI | Incidence,<br>colon cancer,<br>women<br>Incidence,<br>colon cancer,<br>men<br>Incidence,<br>rectal cancer,<br>men<br>Incidence,                                                                                | Age, smoking status,<br>occupational group                   |

|                                  |                                                                                      |                             |                                                       |                                 |                                |                                                  |                                                                                                                                                                                                                                                                           |
|----------------------------------|--------------------------------------------------------------------------------------|-----------------------------|-------------------------------------------------------|---------------------------------|--------------------------------|--------------------------------------------------|---------------------------------------------------------------------------------------------------------------------------------------------------------------------------------------------------------------------------------------------------------------------------|
|                                  |                                                                                      |                             |                                                       |                                 |                                | rectal cancer, women                             |                                                                                                                                                                                                                                                                           |
| Otani, 2005<br>COL01891<br>Japan | JPHC study-cohort I and II, Prospective Cohort, Age: 40-69 years, M/W                | 626/<br>102 949<br>9 years  | Population registries                                 |                                 | Height                         | Incidence, colorectal cancer, men                | Age, alcohol consumption, smoking status, miso soup intake, public health centre area, refraining from salty foods and animal fats                                                                                                                                        |
|                                  |                                                                                      | 360/                        |                                                       |                                 |                                | Incidence, colorectal cancer, women              |                                                                                                                                                                                                                                                                           |
| Lin, 2004<br>USA                 | WHS, Prospective Cohort, Age: 45- years, W, professionals                            | 202/<br>36 876<br>8.7 years |                                                       |                                 | BMI                            | Incidence, colorectal cancer, women              | Age, alcohol consumption, family history of specific cancer, history of previous polyp and prior endoscopy, menopausal status, physical activity, randomized treatment assignment, red meat intake, smoking status, aspirin use, postmenopausal hormone use, total energy |
|                                  |                                                                                      | 158/                        |                                                       |                                 |                                | Incidence, colon cancer                          |                                                                                                                                                                                                                                                                           |
|                                  |                                                                                      | 83/                         |                                                       |                                 |                                | Incidence, colon, proximal                       |                                                                                                                                                                                                                                                                           |
|                                  |                                                                                      | 75/                         |                                                       |                                 |                                | Incidence, colon, distal                         |                                                                                                                                                                                                                                                                           |
| Moore, 2004<br>USA               | FHS, Prospective Cohort, Age: 30-79 years, M/W, members of original Framingham study | 306/                        | Self-report, health check, National Death Index       | Height and weight were measured | BMI<br><br>Waist-circumference | Incidence, colon cancer                          | Age, sex, alcohol consumption, educational level, physical activity, smoking habits, height                                                                                                                                                                               |
|                                  |                                                                                      | 97/                         |                                                       |                                 |                                | Incidence, proximal colon cancer, age: 30-54 yrs |                                                                                                                                                                                                                                                                           |
|                                  |                                                                                      | 91/                         |                                                       |                                 |                                | Age: 55-79 yr                                    |                                                                                                                                                                                                                                                                           |
|                                  |                                                                                      | 56/                         |                                                       |                                 |                                | Incidence, distal colon cancer, age: 30-54 yrs   |                                                                                                                                                                                                                                                                           |
|                                  |                                                                                      | 53/                         |                                                       |                                 |                                | Age: 55-79 yr                                    |                                                                                                                                                                                                                                                                           |
| Sanjoaquin, 2004<br>UK           | OVS, Prospective Cohort, Age: 18-89 years, M/W                                       | 92/<br>10 998<br>17 years   | Population/invitation                                 | Self-reported                   | BMI                            | Incidence, colorectal cancer,                    | Age, sex<br>Alcohol consumption, smoking habits                                                                                                                                                                                                                           |
| Wei, 2004<br>USA                 | NHS, Prospective Cohort, W, nurses                                                   | 672/<br>87 733<br>24 years  | Self-report, medical records and National Death Index | Self-reported                   | BMI                            | Incidence, colon cancer,                         | Age, family history, BMI, physical activity, beef, pork or lamb as a main dish, processed meat, alcohol,                                                                                                                                                                  |
|                                  |                                                                                      | 204/                        |                                                       |                                 |                                | Incidence,                                       |                                                                                                                                                                                                                                                                           |

|                          |                                                   |                                               |                                      |               |        |                                |                                                                                        |
|--------------------------|---------------------------------------------------|-----------------------------------------------|--------------------------------------|---------------|--------|--------------------------------|----------------------------------------------------------------------------------------|
|                          |                                                   |                                               |                                      |               |        | rectal cancer                  | calcium, folate, height, pack-years smoking before age 30, history of endoscopy        |
|                          | HPFS, Prospective Cohort, M, Health professionals | 135/<br>46 632<br>467/                        |                                      |               |        | Incidence, rectal cancer       |                                                                                        |
|                          |                                                   |                                               |                                      |               |        | Incidence, colon cancer        |                                                                                        |
|                          | HPFS & NHS                                        | 1123/<br>134 356                              |                                      |               |        | Incidence, colon cancer,       |                                                                                        |
|                          |                                                   | 336/                                          |                                      |               |        | Incidence, rectal cancer       |                                                                                        |
|                          |                                                   | 1459/                                         |                                      |               |        | Incidence, colorectal cancer   |                                                                                        |
| MacInnis, 2004 Australia | MCCS, Prospective Cohort, Age: 27-75 years, M     | 153/<br>16 566<br><br>145 433<br>Person years | Cancer registry                      |               | Height | Incidence, colon cancer        | Age, sex, country of birth,                                                            |
| Saydah, 2003 USA         | CLUE II, Nested Case Control, Age: 45- years, M/W | 173/<br>346<br>controls                       | Cancer registry                      | Self-report   | BMI    | Incidence, colorectal cancer,  | Age, sex, date of blood draw, race, time since last meal                               |
|                          |                                                   | 132/                                          |                                      |               |        | Incidence, colon cancer,       |                                                                                        |
|                          |                                                   | 126/                                          |                                      |               |        | Incidence, rectal cancer       |                                                                                        |
| Shimizu, 2003 Japan      | TCCJ, Prospective Cohort, Age: 35- years, M/W     | 108/<br>29 051<br>8 years                     | Hospital records and cancer registry | Self-reported | Height | Incidence, colon cancer, men   | Age, alcohol consumption, educational level, physical activity, smoking habits, height |
|                          |                                                   | 93/                                           |                                      |               |        | Incidence, colon cancer, women |                                                                                        |
|                          |                                                   | 59/                                           |                                      |               |        | Incidence, rectal cancer, men  |                                                                                        |

|                    |                                                             |                                    |                                                                 |                                 |        |                                   |                                                                                                                               |
|--------------------|-------------------------------------------------------------|------------------------------------|-----------------------------------------------------------------|---------------------------------|--------|-----------------------------------|-------------------------------------------------------------------------------------------------------------------------------|
|                    |                                                             | 41/                                |                                                                 |                                 |        | Incidence, rectal cancer, women   |                                                                                                                               |
| Gunnell, 2003 UK   | Caerphilly study, Prospective cohort study, Age:45-59 years | 38/2512<br>21 years                | Central personal register                                       | Measured                        | Height | Incidence, colorectal cancer      | Age, smoking status, BMI, occupation, household size, unemployment                                                            |
| Terry, 2002 Canada | CNBSS, Prospective Cohort, Age: 40-59 years, W              | 527/89 835<br>936 433 person-years | National Mortality Database and to the Canadian Cancer Database | Self-reported                   | BMI    | Incidence, colorectal cancer      | Age, educational level, oral contraceptive use, parity, physical activity, smoking habits, HRT                                |
|                    |                                                             | 363/                               |                                                                 |                                 |        | Incidence, colon cancer           |                                                                                                                               |
|                    |                                                             | 172/                               |                                                                 |                                 |        | Incidence, proximal colon cancer  |                                                                                                                               |
|                    |                                                             | 164/                               |                                                                 |                                 |        | Incidence, rectal cancer          |                                                                                                                               |
|                    |                                                             | 148/                               |                                                                 |                                 |        | Incidence, distal colon cancer    |                                                                                                                               |
| Terry, 2001 Sweden | SWSC, Prospective Cohort, Age: 40-76 years, W               | 460/61 463<br>588 270 person-years | Cancer registry                                                 | Self-reported                   | BMI    | Incidence, colorectal cancer,     | Age, alcohol consumption, educational level, energy intake, red meat intake, vitamin d, calcium, folate, total fat, vitamin c |
|                    |                                                             | 291/                               |                                                                 |                                 |        | Incidence, colon cancer,          |                                                                                                                               |
|                    |                                                             | 159/                               |                                                                 |                                 |        | Incidence, rectal cancer,         |                                                                                                                               |
|                    |                                                             | 118/                               |                                                                 |                                 |        | Incidence, proximal colon cancer, |                                                                                                                               |
|                    |                                                             | 101/                               |                                                                 |                                 |        | Incidence, distal colon cancer,   |                                                                                                                               |
| Kaaks, 2000 USA    | NYUWHS, Nested Case Control,                                | 100/196<br>controls                | Active follow up by questionnaire; cancer registry and          | Self-reported height and weight | BMI    | Incidence, colorectal cancer      | Age, menopausal status, reproductive factors, smoking status, time                                                            |

|                   |                                                                      |                                           |                                       |                                 |                                               |                                   |                                                                                                                                                                                                                                            |
|-------------------|----------------------------------------------------------------------|-------------------------------------------|---------------------------------------|---------------------------------|-----------------------------------------------|-----------------------------------|--------------------------------------------------------------------------------------------------------------------------------------------------------------------------------------------------------------------------------------------|
|                   | Age: 35-65 years, W, Screening Program                               | 73/<br>144<br>controls                    | national death Index                  |                                 |                                               | Incidence, colon cancer           |                                                                                                                                                                                                                                            |
| Folsom, 2000 USA  | IWHS, Prospective Cohort, Age: 55-69 years, W                        | 462/<br>31 702<br>10 years                | SEER                                  | Self-reported                   | Waist-circumference<br><br>Waist to hip ratio | Incidence, colon cancer           | Age, BMI, age at first child birth, alcohol consumption, estrogen use, educational level, smoking status, physical activity, pack-years of cigarette, energy intake, intakes of fish, fruit, red meat, vegetables whole grain, vitamin use |
| Ford, 1999 USA    | NHANES I, Prospective Cohort, Age: 25-74 years, M/W                  | 222/<br>13 420<br>19 years                | Multistage stratified sampling design | Weight and height were measured | BMI                                           | Incidence, colon cancer           | Age                                                                                                                                                                                                                                        |
|                   |                                                                      |                                           |                                       |                                 |                                               | Incidence, colon cancer, men      |                                                                                                                                                                                                                                            |
|                   |                                                                      |                                           |                                       |                                 |                                               | Incidence, colon cancer, women    |                                                                                                                                                                                                                                            |
| Schoen, 1999 USA  | CHS, Prospective Cohort, Age: 65- years, M/W                         | 102/<br>5 849                             | Medicare enrolment lists              | Weight and height were measured | BMI                                           | Incidence, colorectal cancer      | Age, sex, physical activity                                                                                                                                                                                                                |
| Singh, 1998 USA   | AHS, Prospective Cohort, Age: 25- years, M/W, Seventh-day Adventists | 142/<br>32 051<br>178 544<br>person-years | Hospital records and cancer registry  | Self-reported                   | BMI                                           | Incidence, colon cancer           | Age, sex, family history of specific cancer                                                                                                                                                                                                |
|                   |                                                                      | 83/                                       |                                       |                                 |                                               | Incidence, colon cancer, women    |                                                                                                                                                                                                                                            |
|                   |                                                                      | 59/                                       |                                       |                                 |                                               | Incidence, colon cancer, men      |                                                                                                                                                                                                                                            |
| Albanes, 1988 USA | NHANES I Age: 25-74 years, M/W                                       | 62/<br>12 554<br>10 years                 | Hospital records, death certificate   | Measured                        | Height                                        | Incidence, colorectal cancer, men | Age                                                                                                                                                                                                                                        |

|                           |                                                                             |                                                                                   |                                                         |                                    |                       |                                                                                                                                                               |                                                                                                                                                              |
|---------------------------|-----------------------------------------------------------------------------|-----------------------------------------------------------------------------------|---------------------------------------------------------|------------------------------------|-----------------------|---------------------------------------------------------------------------------------------------------------------------------------------------------------|--------------------------------------------------------------------------------------------------------------------------------------------------------------|
|                           |                                                                             | 67/                                                                               |                                                         |                                    |                       | Incidence, colorectal cancer, women                                                                                                                           |                                                                                                                                                              |
| Tulinius, 1997<br>Iceland | ICRF,<br>Prospective Cohort,<br>M/W                                         | 193/<br>22 946                                                                    | Population registry                                     | Anthropometrics<br>measured        | BMI<br><br>Weight     | Incidence,<br>colorectal<br>cancer, men                                                                                                                       | Age                                                                                                                                                          |
| Kato, 1997<br>USA         | NYUWHS,<br>Prospective Cohort,<br>Age: 34-65 years,<br>W                    | 100/<br>14 272<br>105 044<br>person-<br>years                                     | Questionnaire,<br>medical records,<br>cancer registries |                                    | Height                | Incidence,<br>colorectal<br>cancer                                                                                                                            | Age, place at enrolment                                                                                                                                      |
| Hebert, 1997<br>USA       | PHS<br>Age: 40-84 years<br>M                                                | 341/<br>22 071<br>12 years                                                        | Medical records                                         | Self-reported                      | Height                | Incidence,<br>colorectal<br>cancer<br><br>Incidence,<br>colon cancer                                                                                          | Age, beta-carotene, BMI,<br>Aspirin use, smoking, alcohol<br>consumption, physical activity                                                                  |
| Martínez, 1997<br>USA     | NHS,<br>Prospective Cohort,<br>Age: 30-55 years,<br>W,<br>Registered nurses | 161/<br>89 448<br>1 012 375<br>person-<br>years                                   | Cancer registry                                         | Self-reported                      | Waist to hip<br>ratio | Incidence,<br>colon cancer,<br>1986-1992<br>follow-up                                                                                                         | Age, alcohol consumption,<br>aspirin use, BMI, cigarette<br>smoking, family history of<br>specific cancer,<br>postmenopausal hormone use,<br>red meat intake |
| Chyou, 1996<br>USA        | HHP,<br>Prospective Cohort,<br>M,<br>Japanese ancestry                      | 330/<br>8 006<br>19 years<br><br>123/                                             | Hospital records +<br>cancer registry                   | Self-reported                      | BMI                   | Incidence,<br>colon cancer<br><br>Incidence,<br>rectal cancer                                                                                                 | Age                                                                                                                                                          |
| Thune, 1996<br>Norway     | NHSCD,<br>Prospective Cohort,<br>Age: 20-69 years,<br>M/W                   | 230/<br>81 516<br>1 305 607<br>person-<br>years<br><br>169/<br><br>99/<br><br>55/ | Cancer registry                                         | Height and weight<br>were measured | BMI                   | Incidence,<br>colon cancer,<br>men<br><br>Incidence,<br>rectal cancer,<br>men<br><br>Incidence,<br>colon cancer,<br>women<br><br>Incidence,<br>rectal cancer, | Age                                                                                                                                                          |

|                          |                                                                |                                               |                                                 |                                    |                                                      | women                                     |                                                                                                                                                                                                                                                                                        |
|--------------------------|----------------------------------------------------------------|-----------------------------------------------|-------------------------------------------------|------------------------------------|------------------------------------------------------|-------------------------------------------|----------------------------------------------------------------------------------------------------------------------------------------------------------------------------------------------------------------------------------------------------------------------------------------|
| Giovannucci, 1995<br>USA | HPFS,<br>Prospective Cohort,<br>Age: 40-75 years,<br>M         | 117/<br>31 055<br>6 years                     | Medical records,<br>national Death<br>Index     | Questionnaire                      | Waist-<br>circumference<br><br>Waist to hip<br>ratio | Incidence,<br>colon cancer                | Age, alcohol consumption,<br>aspirin use, dietary fibre<br>intake, energy intake, family<br>history of specific cancer,<br>folate intake, history<br>endoscopic screening,<br>methionine intake, physical<br>activity, previous polyp<br>diagnosis, red meat intake,<br>smoking habits |
| Bostick, 1994<br>USA     | IWHS,<br>Prospective Cohort,<br>Age: 55-69 years,<br>W         | 212/<br>35 216<br>167 447<br>person-<br>years | SEER                                            |                                    | Height                                               | Incidence,<br>colon cancer                | Age, energy intake, parity,<br>vitamin a supplement, vitamin<br>E intake                                                                                                                                                                                                               |
| Chyou, 1994<br>USA       | HHP,<br>Prospective Cohort,<br>M,<br>Japanese ancestry         | 289/<br>7 945<br>19 years                     | Selective service<br>draft registration<br>file |                                    | Weight                                               | Incidence,<br>colon cancer                | Age                                                                                                                                                                                                                                                                                    |
|                          |                                                                | 108/                                          |                                                 |                                    |                                                      | Incidence,<br>rectal cancer               |                                                                                                                                                                                                                                                                                        |
| Lee, 1992<br>USA         | HAHS,<br>Prospective Cohort,<br>Age: 48 years,<br>M            | 290/<br>17 595<br>26 years                    | Health examination<br>check                     | Height and weight<br>were measured | BMI                                                  | Incidence,<br>colon cancer,               | Age, physical activity,<br>parental history of cancer                                                                                                                                                                                                                                  |
| Wu, 1987<br>USA          | LWC,<br>Prospective Cohort,<br>M/W,<br>Retirement<br>community | 68/<br>11 644<br>4.5 years                    | Population<br>registries                        | self-administered                  | BMI                                                  | Incidence,<br>colorectal<br>cancer, women | Age                                                                                                                                                                                                                                                                                    |
|                          |                                                                | 58/                                           |                                                 |                                    |                                                      | Incidence,<br>colorectal<br>cancer, men   |                                                                                                                                                                                                                                                                                        |

Figure1.

**A: Height and colon cancer, per 5 cm**

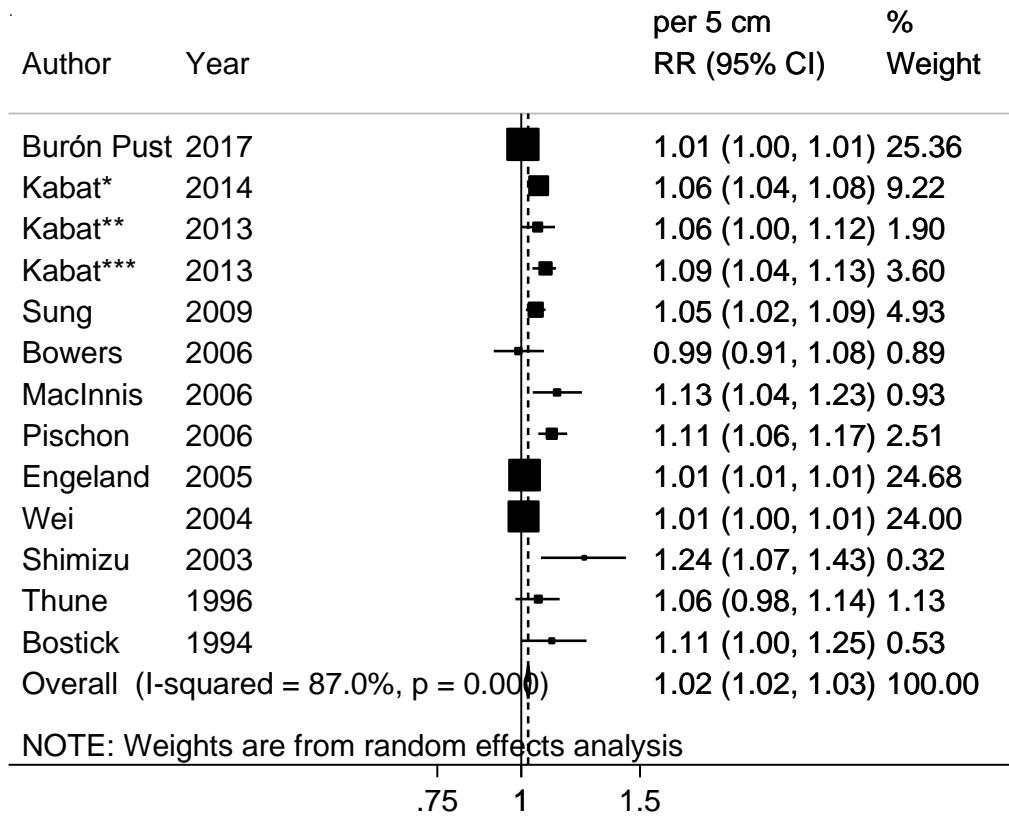

**B: Height and colon cancer, nonlinear dose-response**

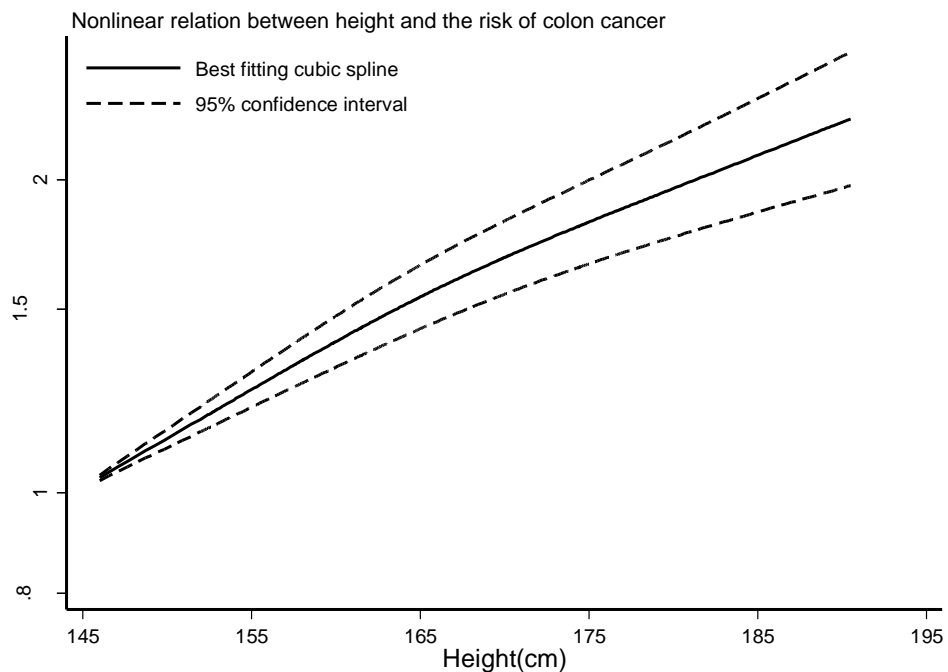



Figure2.

**A: Height and proximal colon cancer**

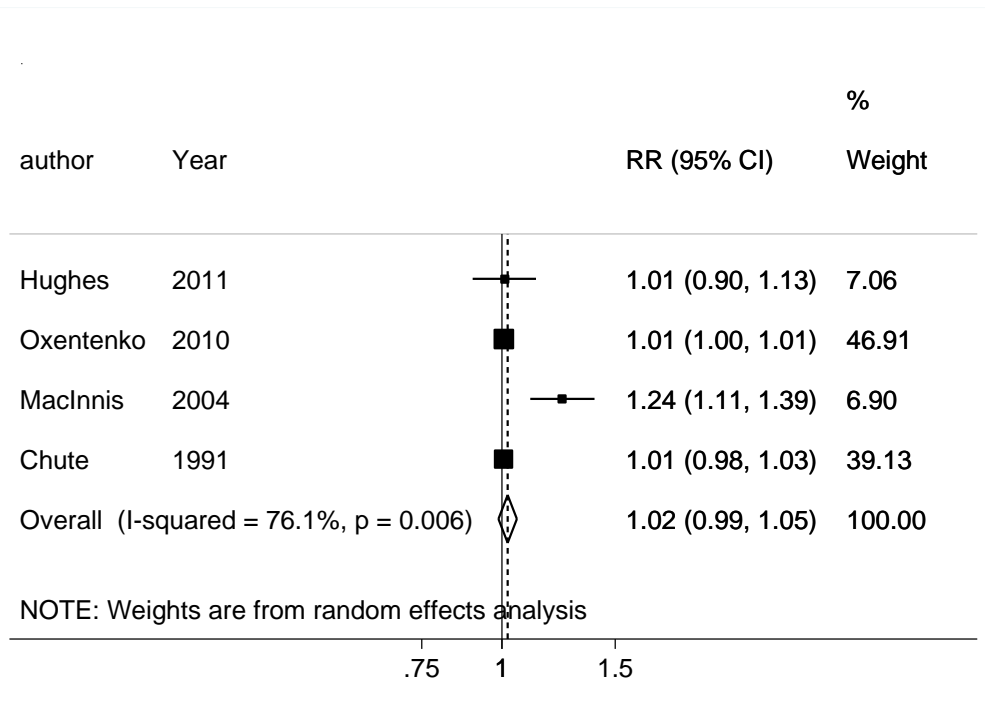

**B: Height and proximal colon cancer, nonlinear dose-response**

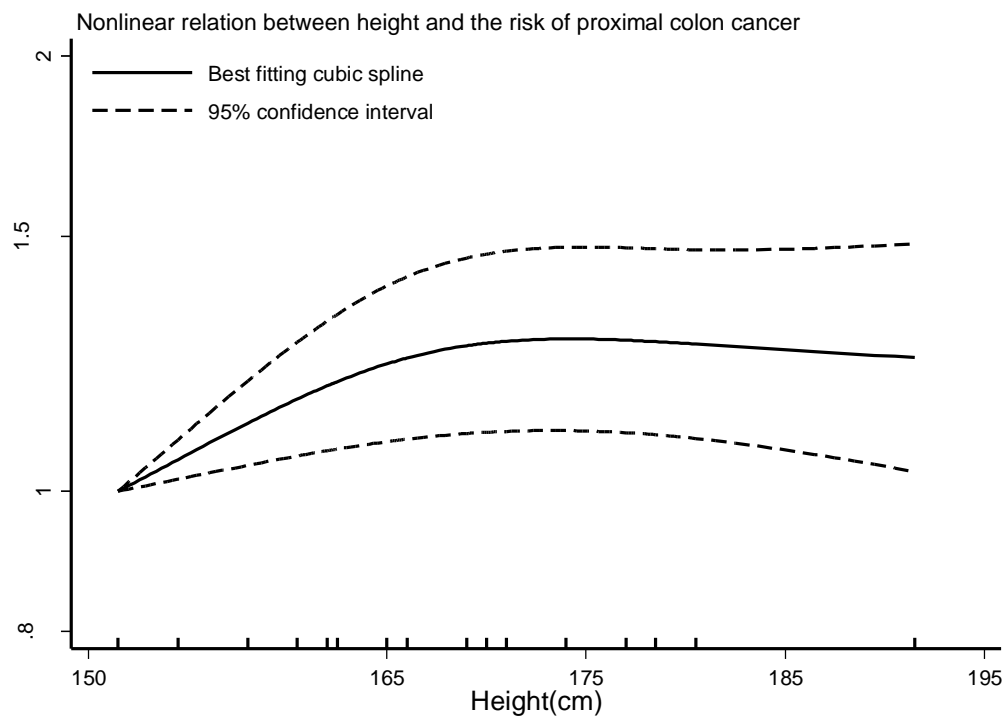

Figure3.

**A: Height and distal colon cancer**

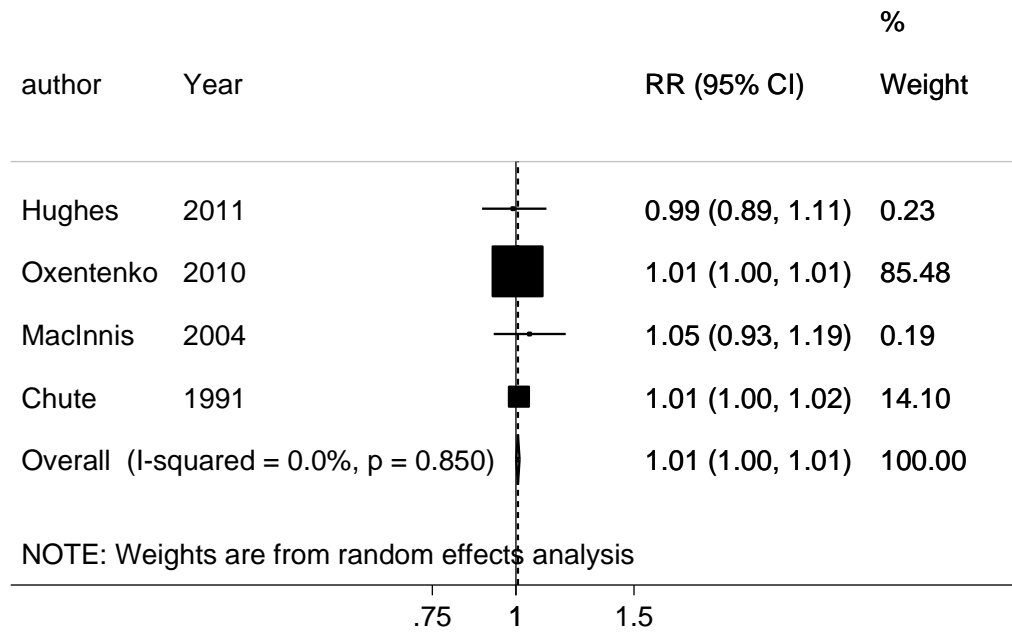

**B: Height and distal colon cancer, nonlinear dose-response**

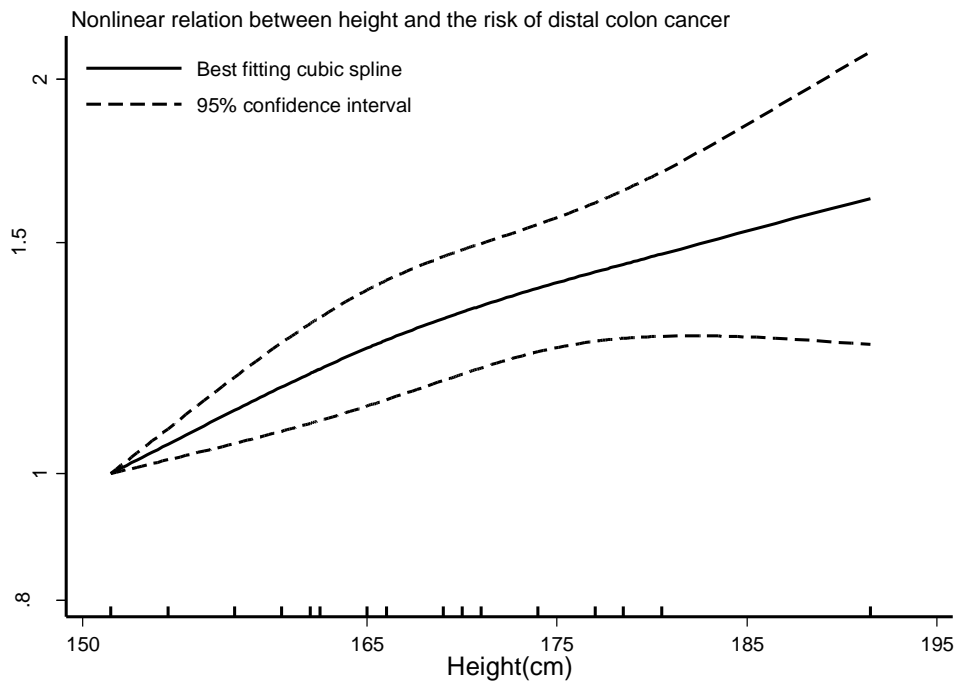

Figure4.

**A: height and rectal cancer, per 5 cm**

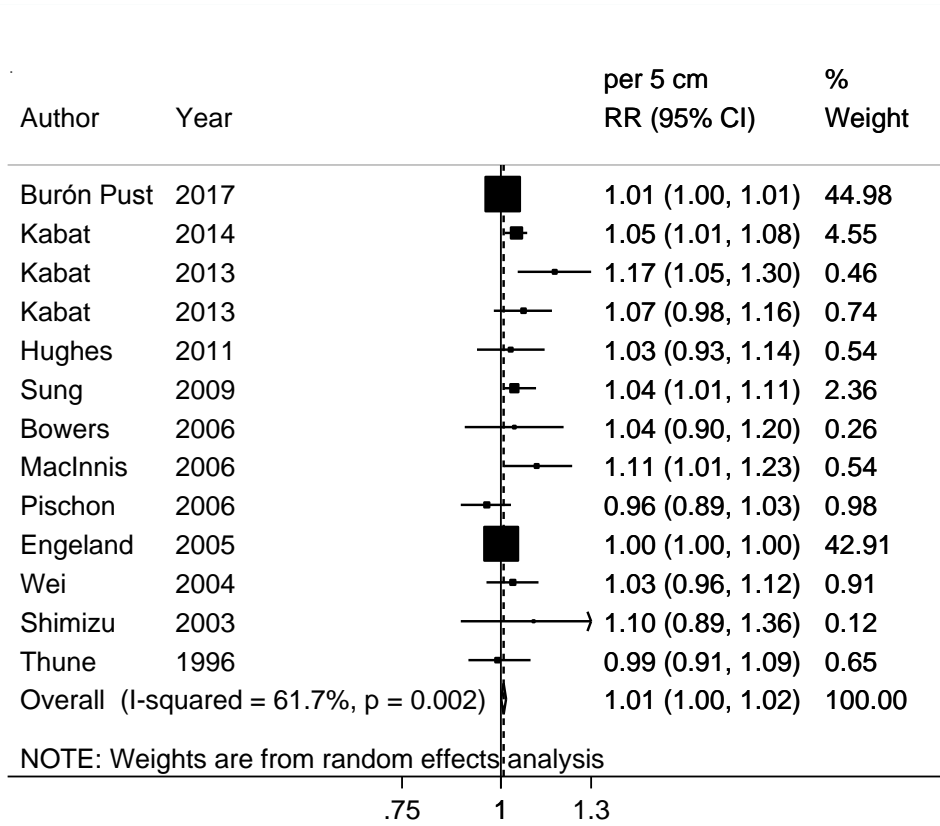

**B: height and rectal cancer, nonlinear dose-response**

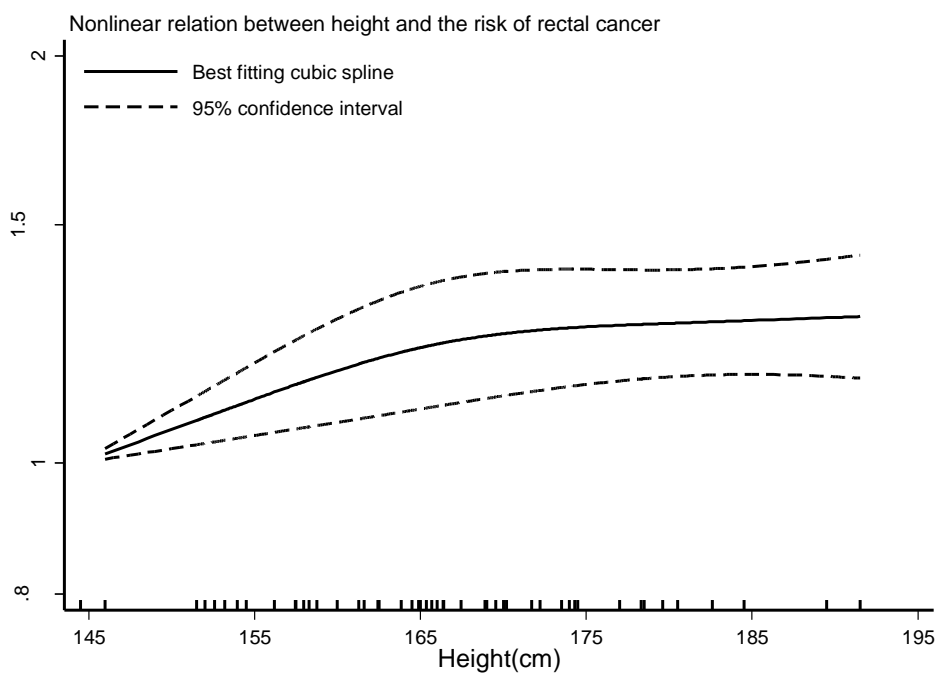

Figure 5.

**A: Weight and colon cancer**

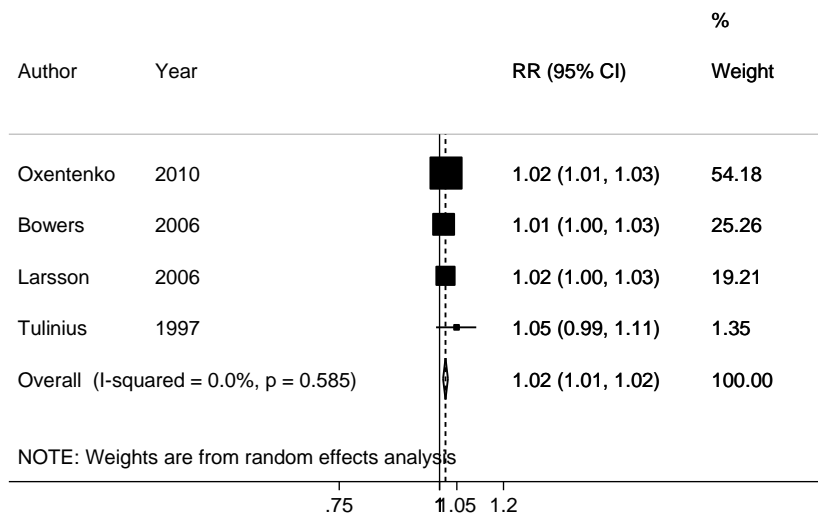

**A: Weight and colon cancer, nonlinear dose-response**

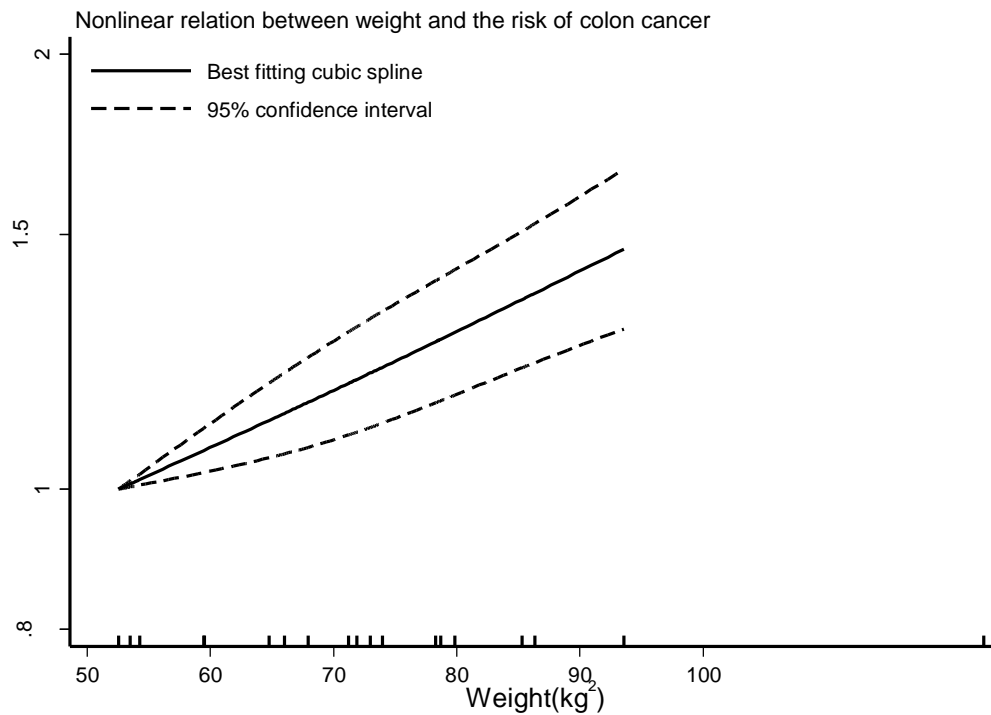

**Figure6.**

**A: weight and proximal colon cancer**

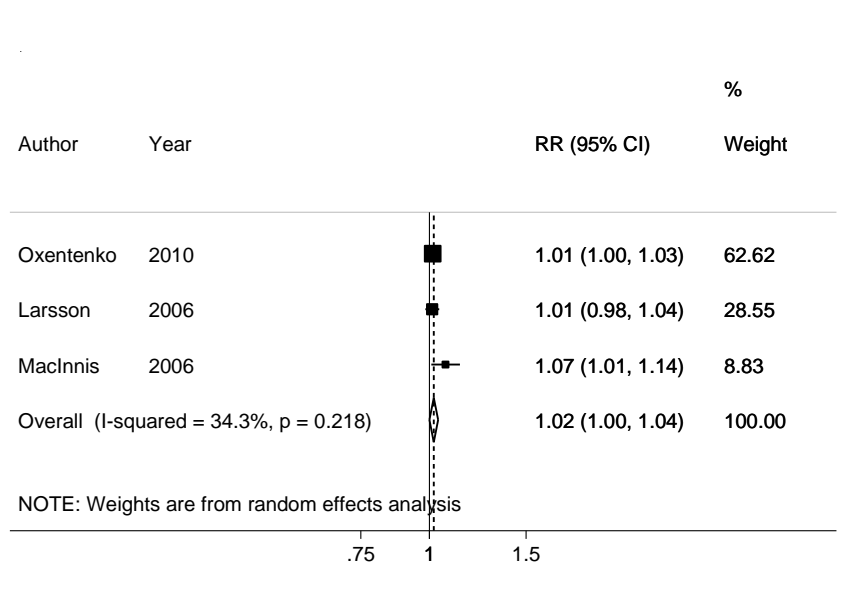

**B: weight and proximal colon cancer, nonlinear dose-response**

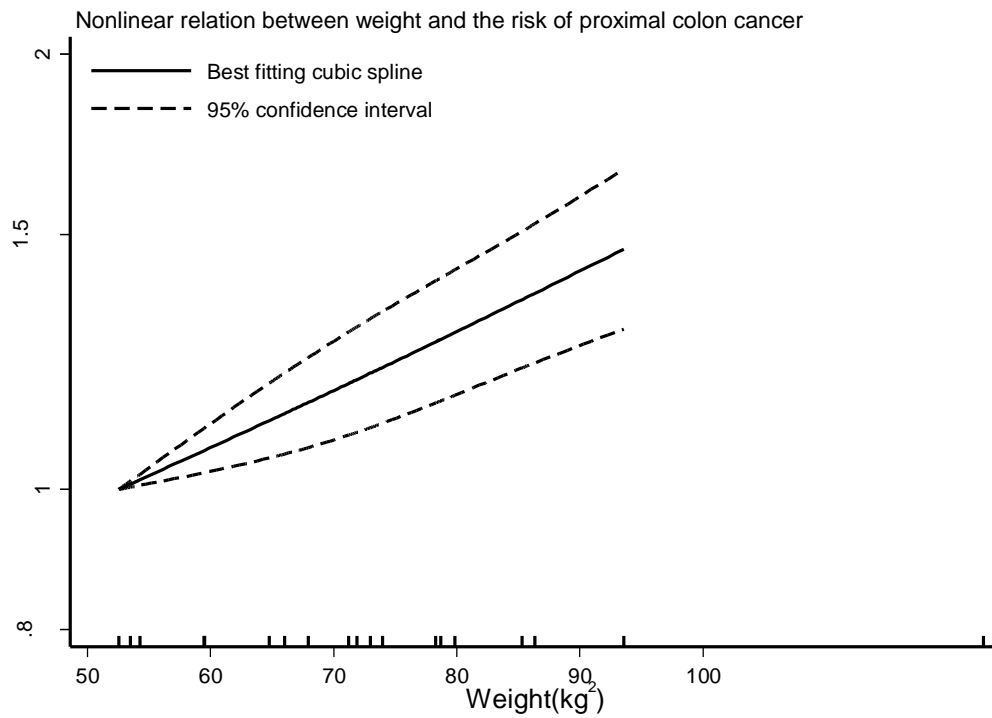

Figure 7.

**A: weight and distal colon cancer**

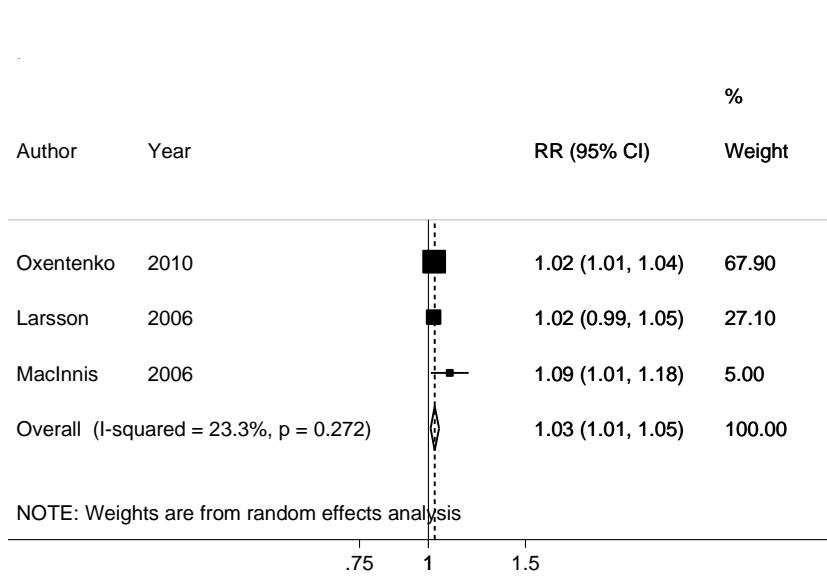

**B: weight and distal colon cancer, nonlinear dose-response**

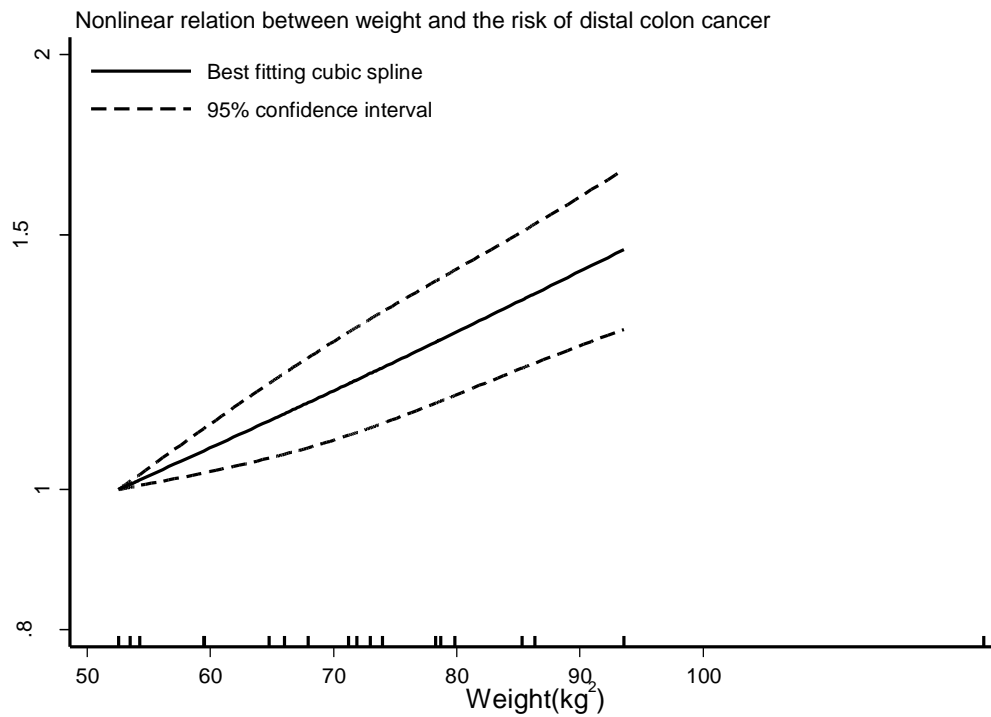

Figure 8.

**A: weight and rectal cancer**

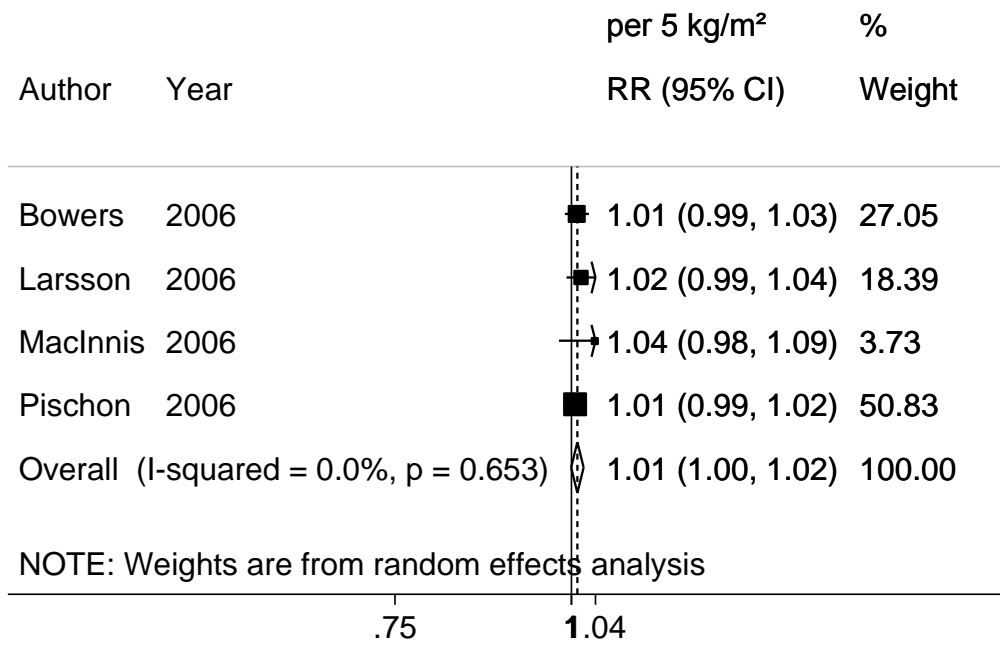

**B: weight and rectal cancer, nonlinear dose-response**

Nonlinear relation between weight and the risk of rectal cancer

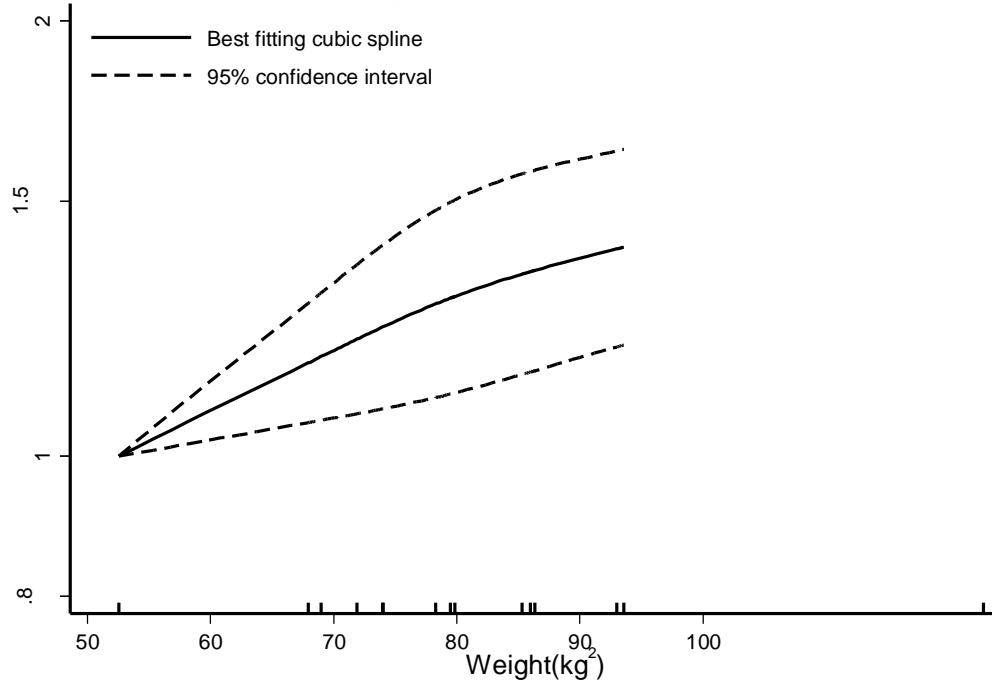



Figure9.

A: BMI and colon cancer, per 5 kg/m<sup>2</sup>

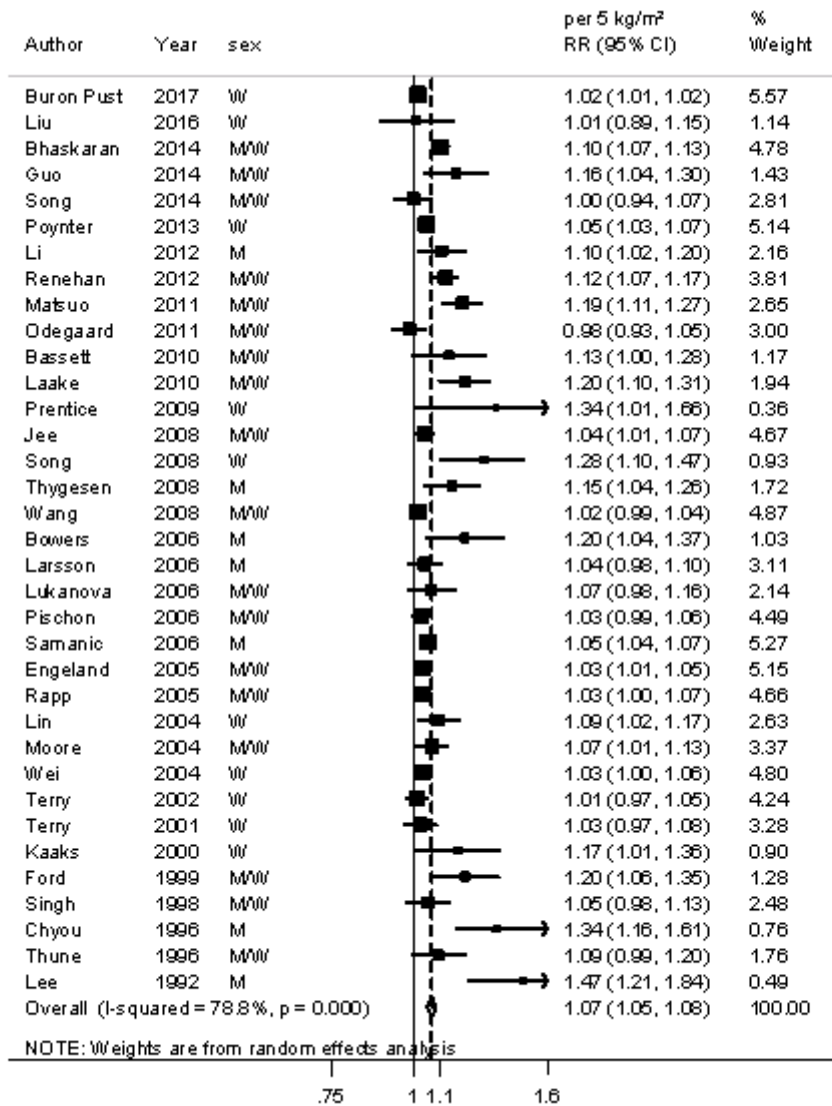

## B: BMI and colon cancer, nonlinear dose-response

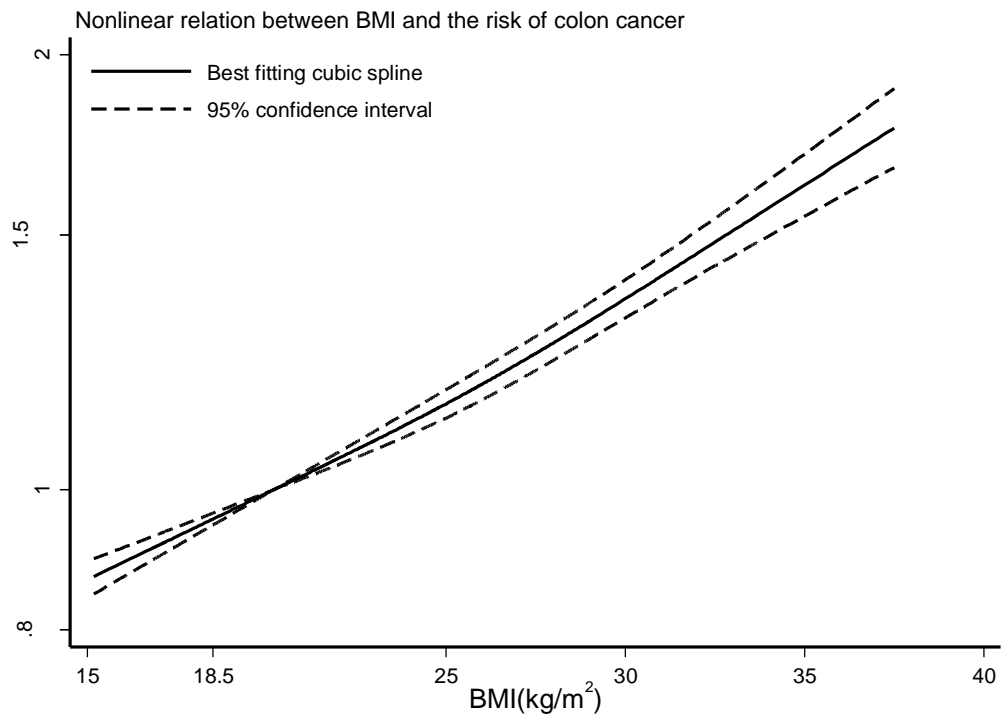

Figure 10.

**A: BMI and proximal colon cancer**

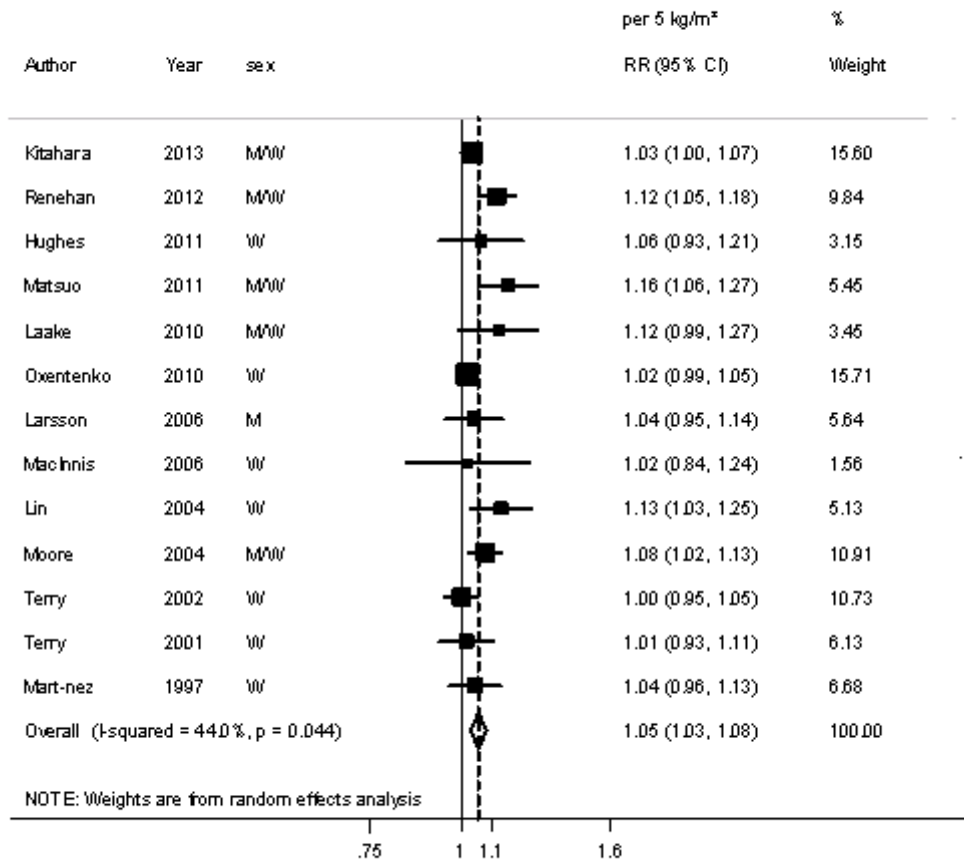

**A: BMI and proximal colon cancer, nonlinear dose-response**

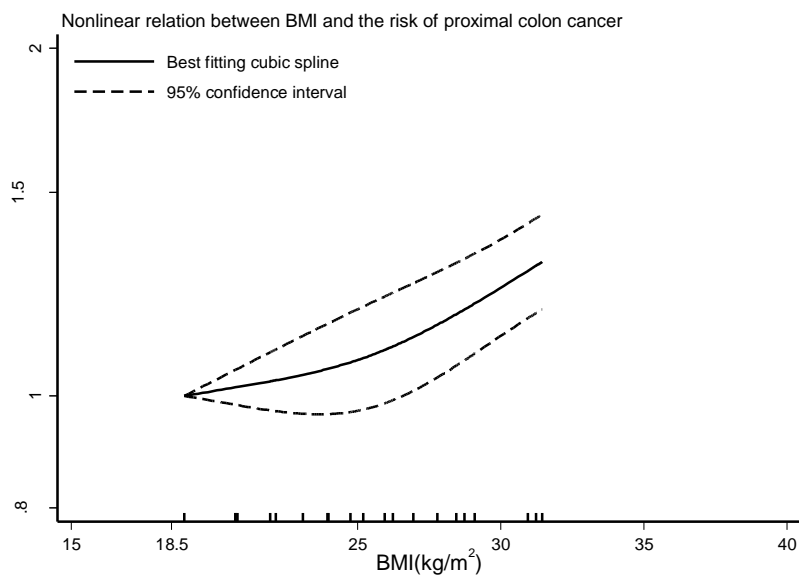

Figure 11.

**A: BMI and distal colon cancer**

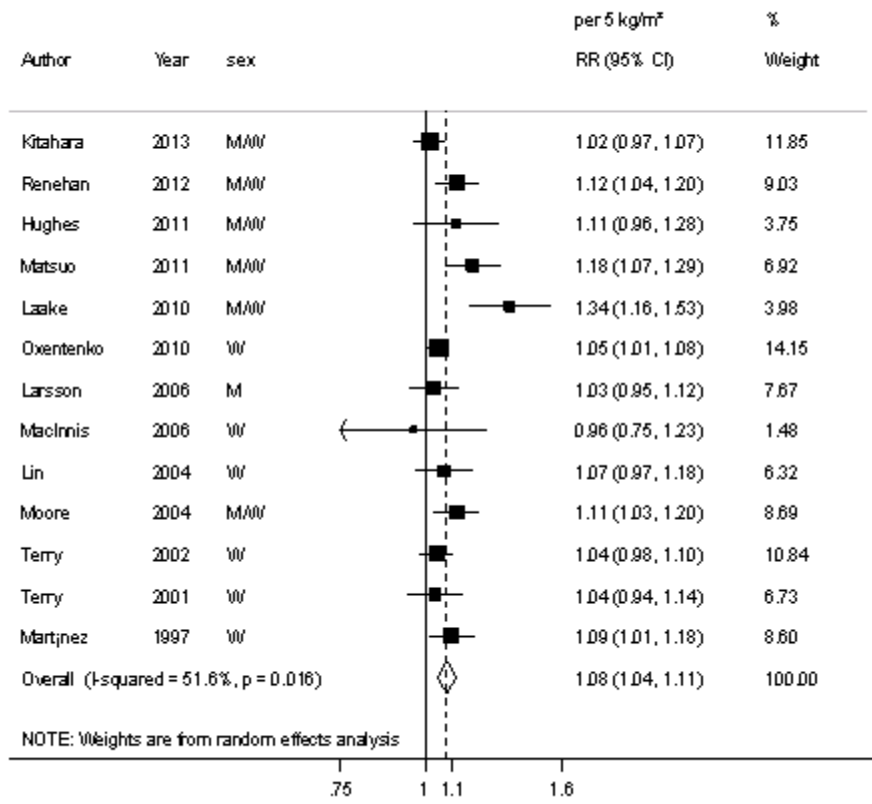

**B: BMI and distal colon cancer, nonlinear dose-response**

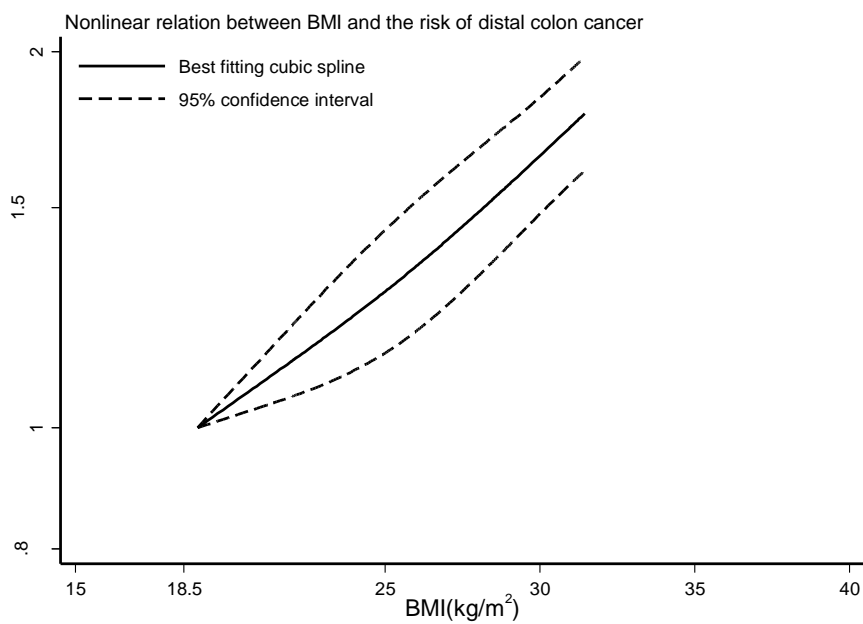

Figure 12.

A: BMI and rectal cancer, per 5 kg/m<sup>2</sup>

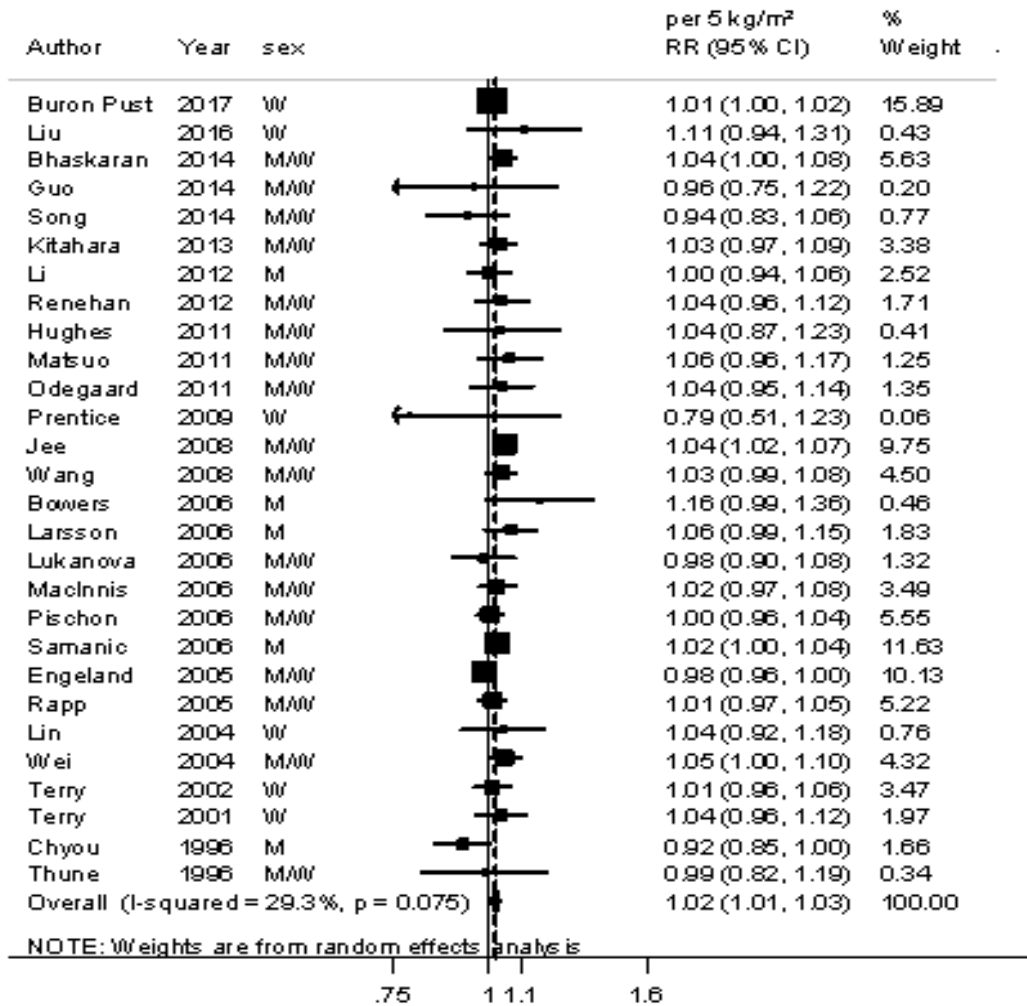

## B: BMI and rectal cancer, nonlinear dose-response

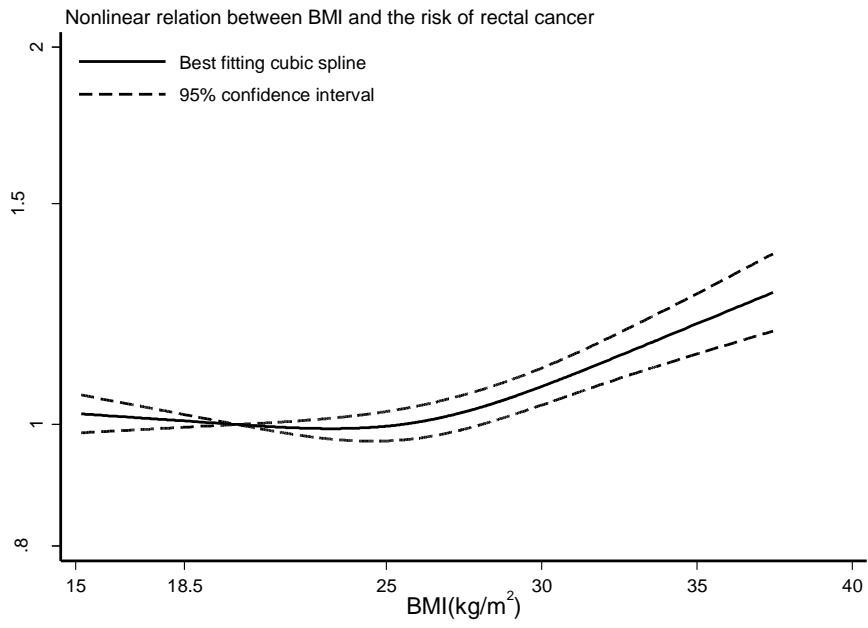

Figure13.

A: Waist circumference and colon cancer, per 10 cm

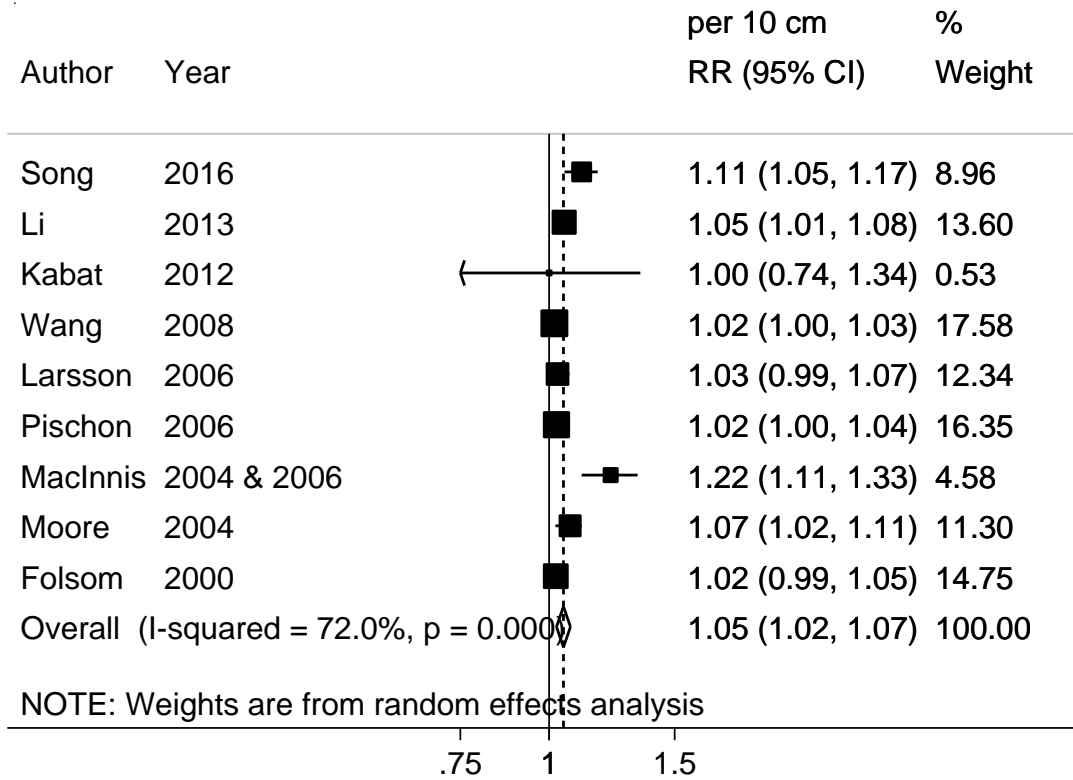

**B: waist circumference and colon cancer, nonlinear dose-response**

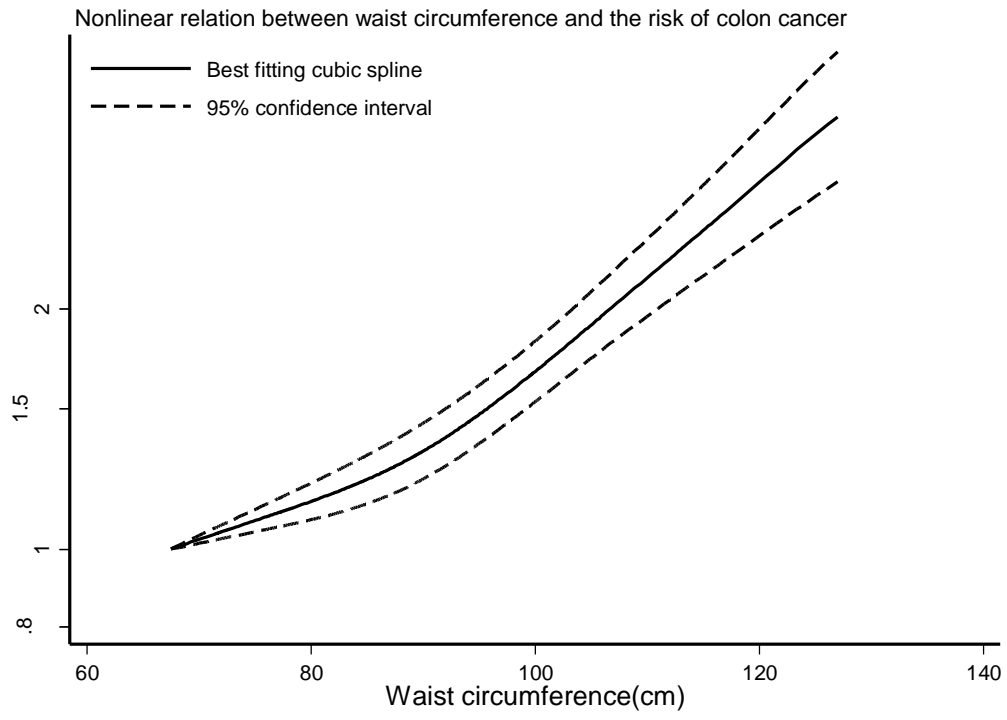



Figure 14.

**A: waist circumference and proximal colon cancer**

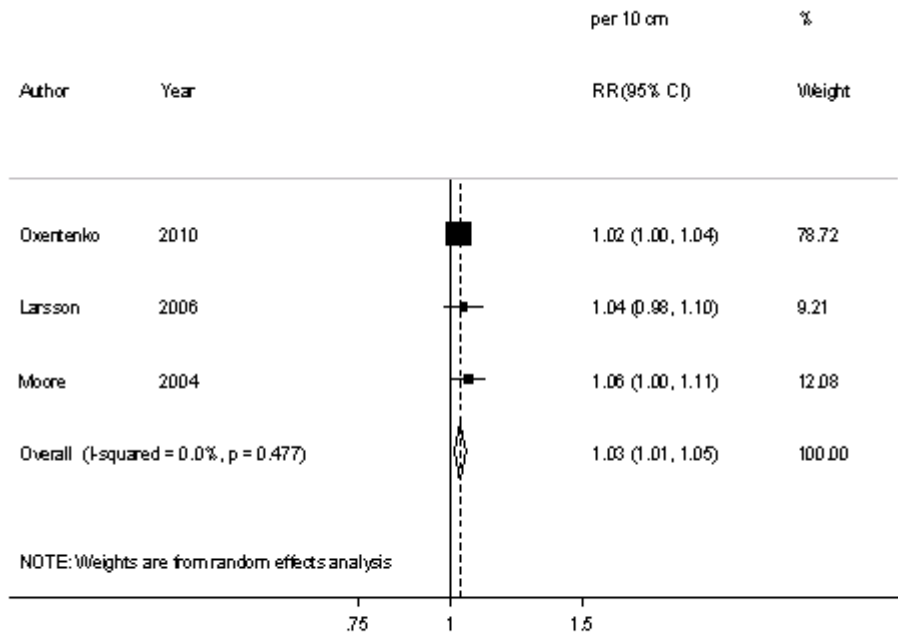

**B: waist circumference and proximal colon cancer, nonlinear dose-response**

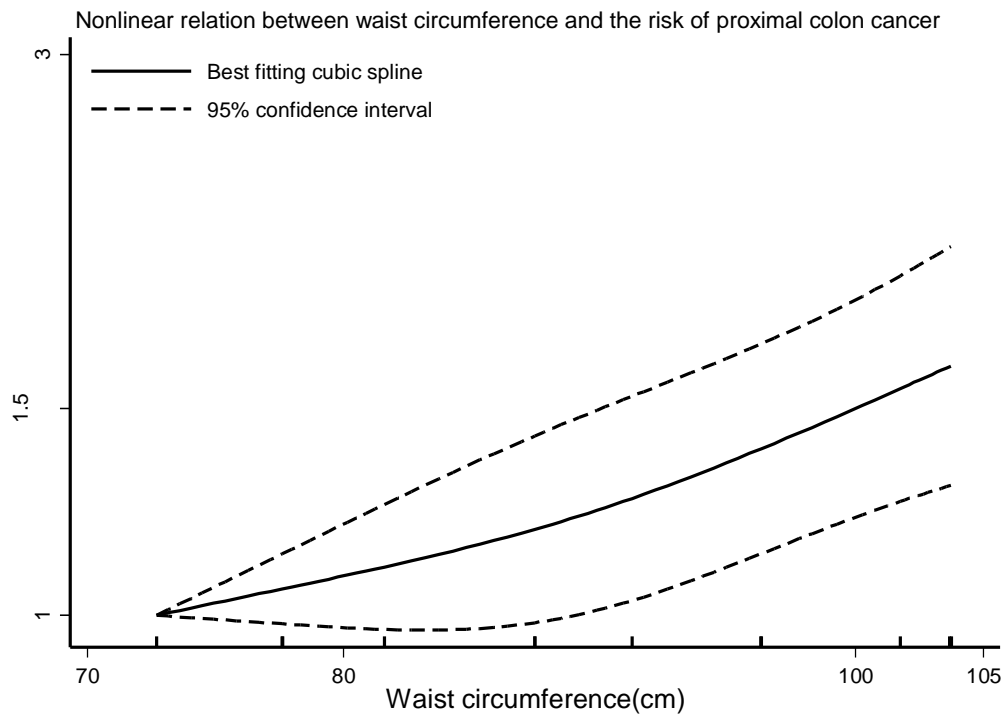

Figure15.

**A: waist circumference and distal colon cancer**

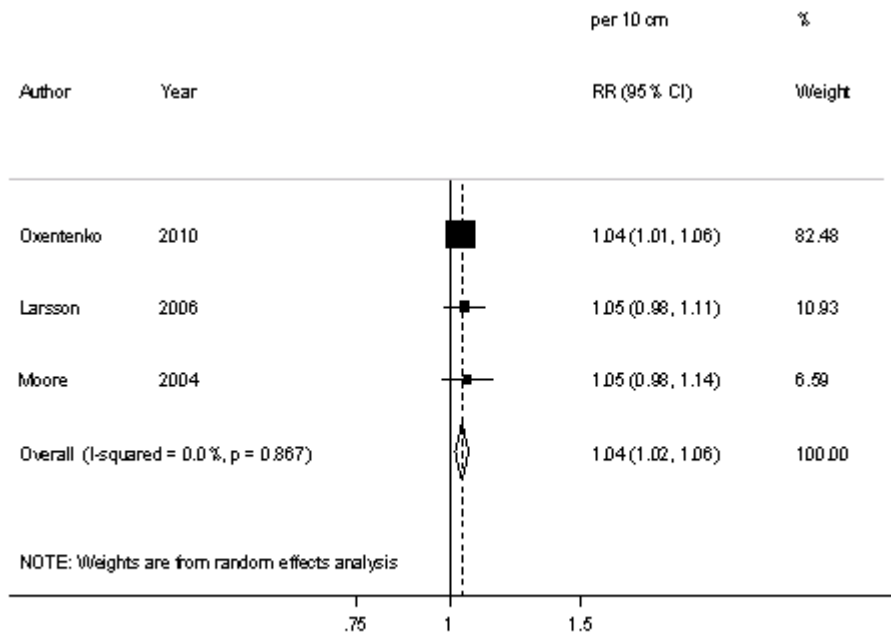

**B: waist circumference and distal colon cancer, nonlinear dose-response**

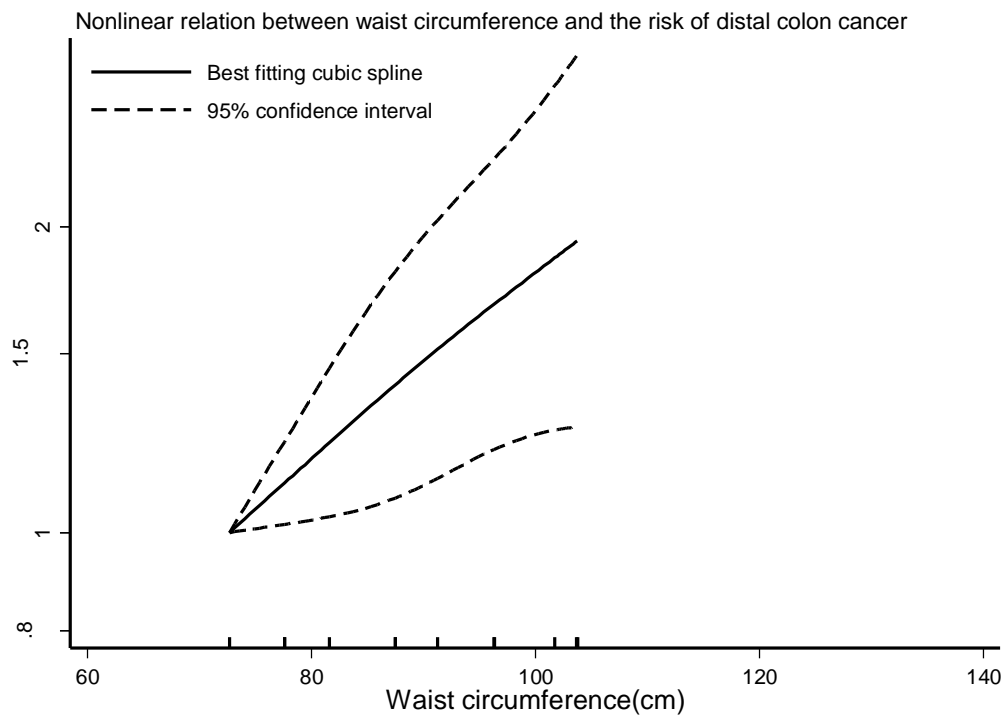

**Figure16.**

**A: waist circumference and rectal cancer, per 10 cm**

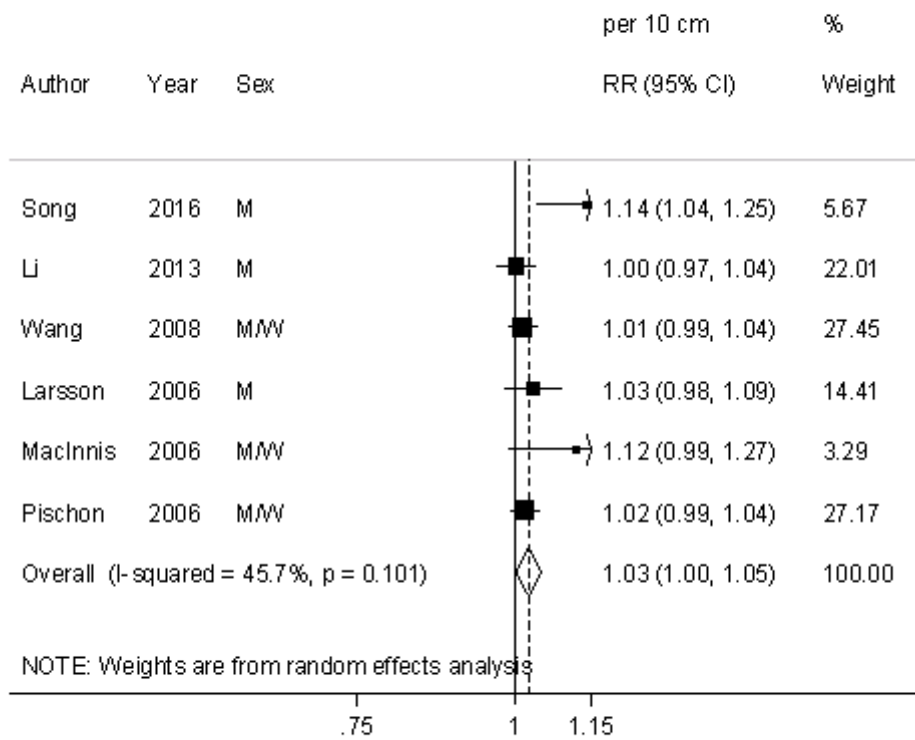

**B: Waist circumference and rectal cancer, nonlinear dose-response**

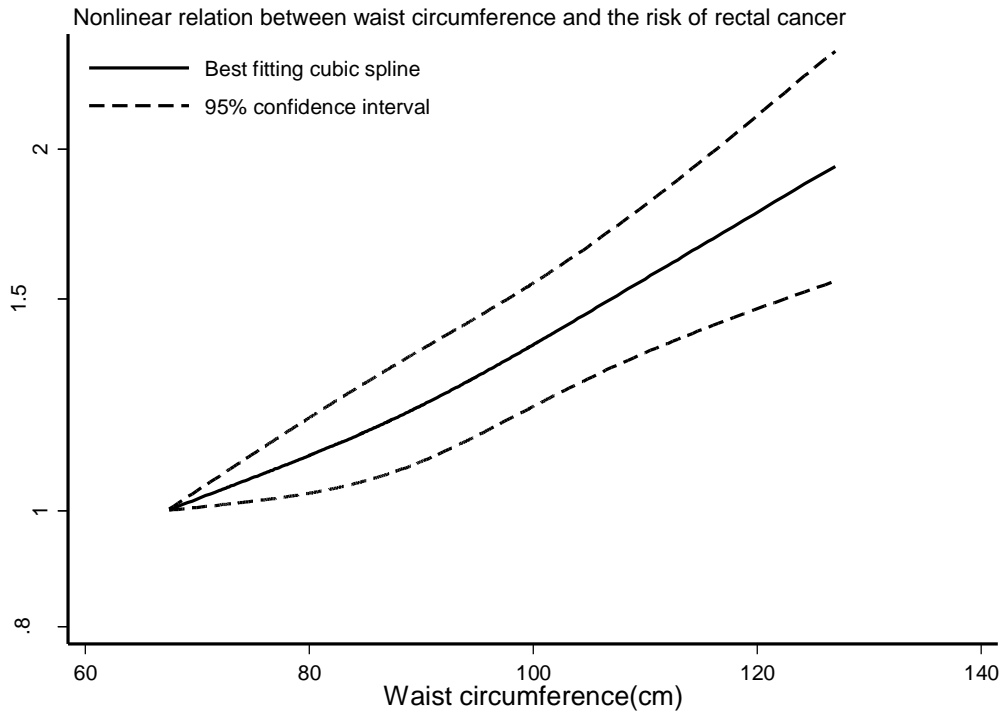

Figure 17.

A: waist to hip ratio and colon cancer, per 0.1 unit

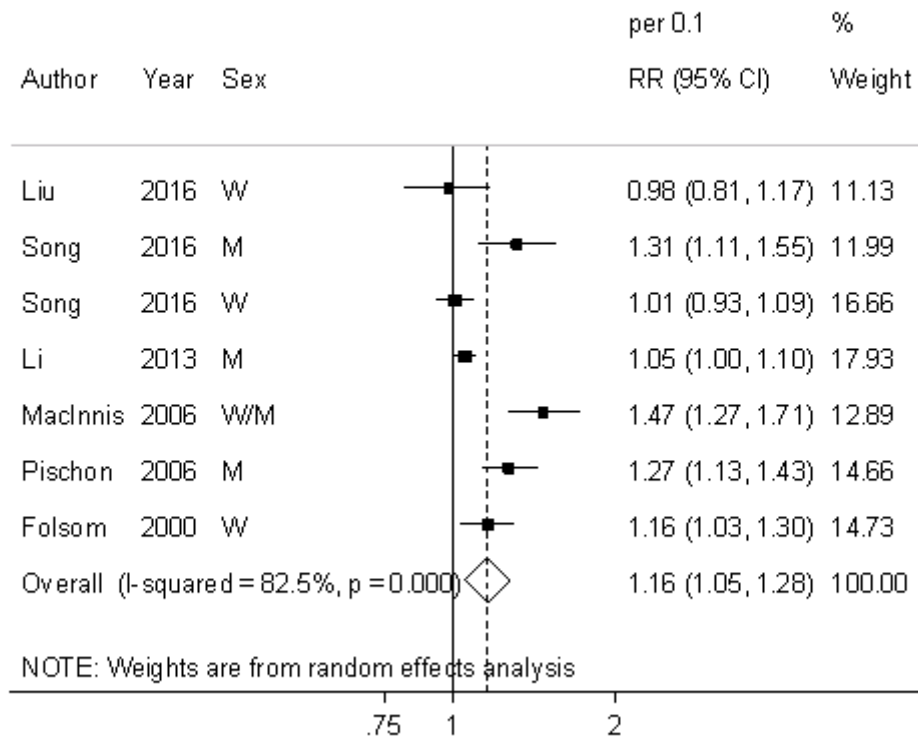

**B: waist to hip ration and colon cancer, nonlinear dose-response**

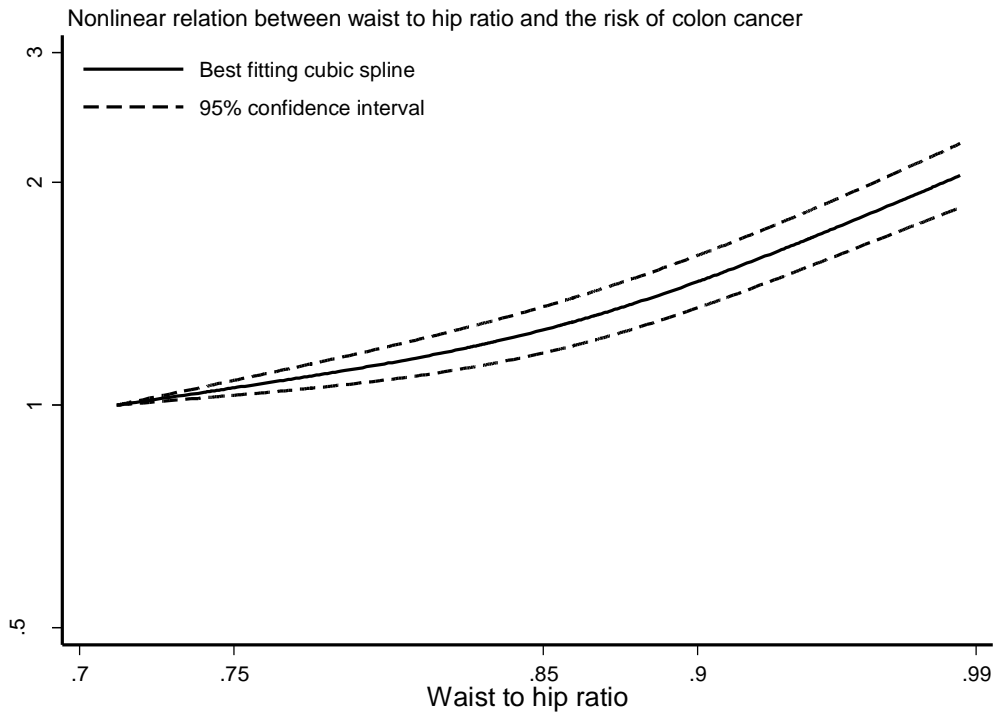

Figure18.

Waist-to-hip ratio and proximal colon cancer

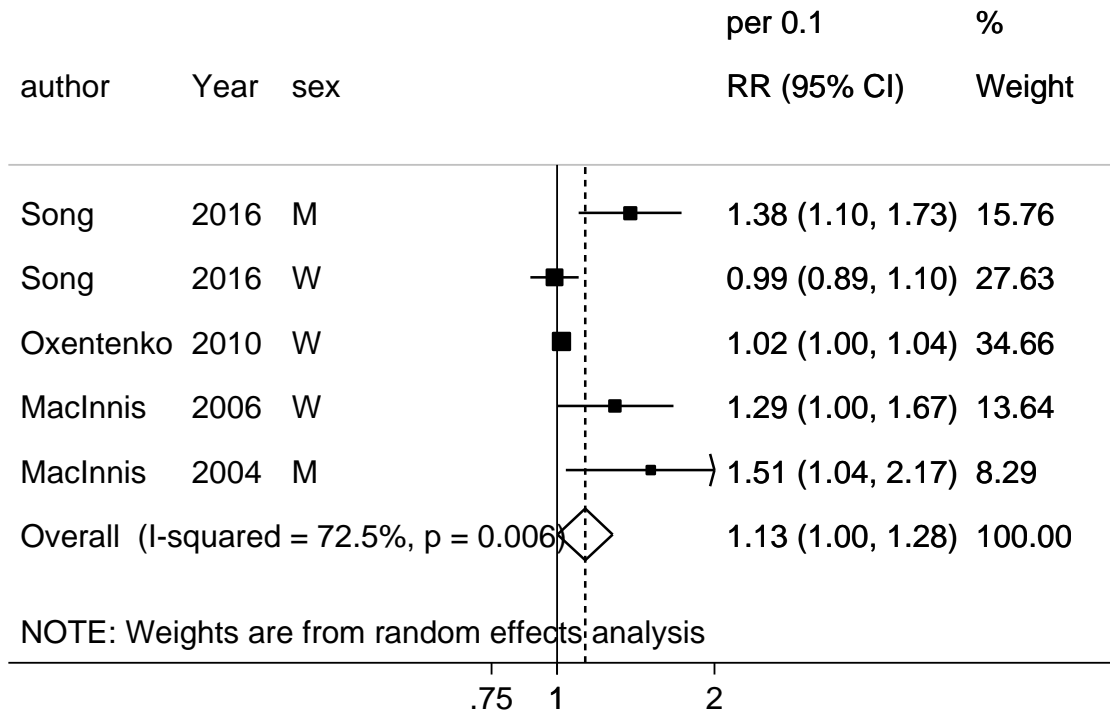

Figure19.

Waist-to-hip ratio and distal colon cancer

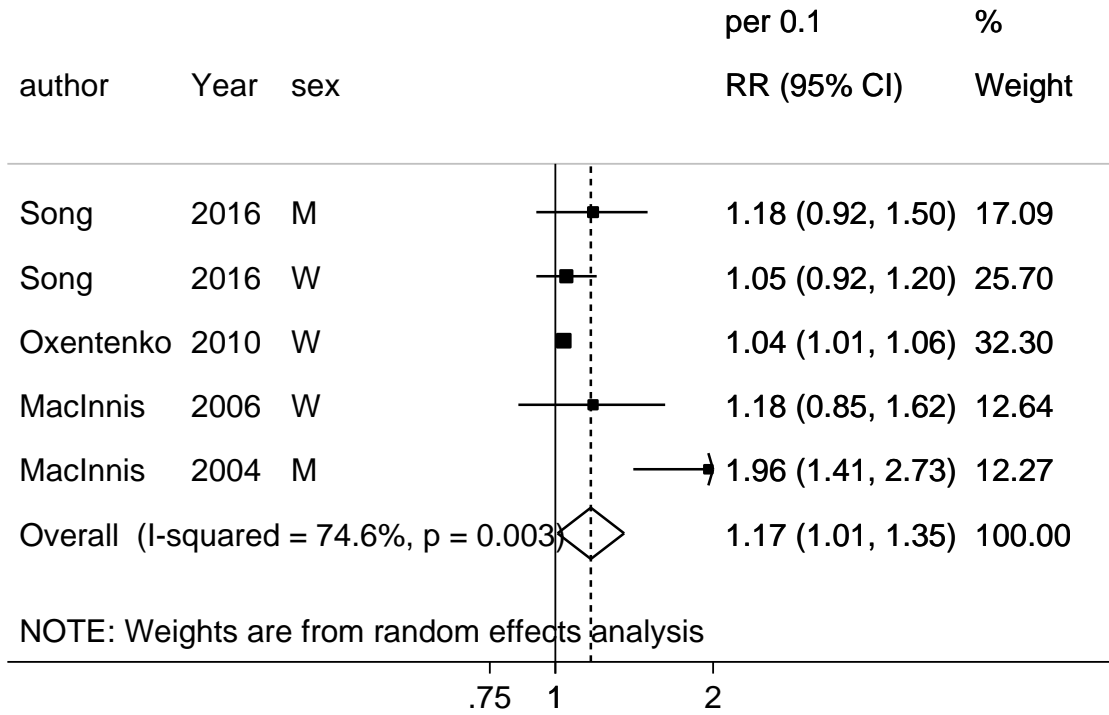



.Figure20.

**A: waist to hip ratio and rectal cancer, per 0.1 unit**

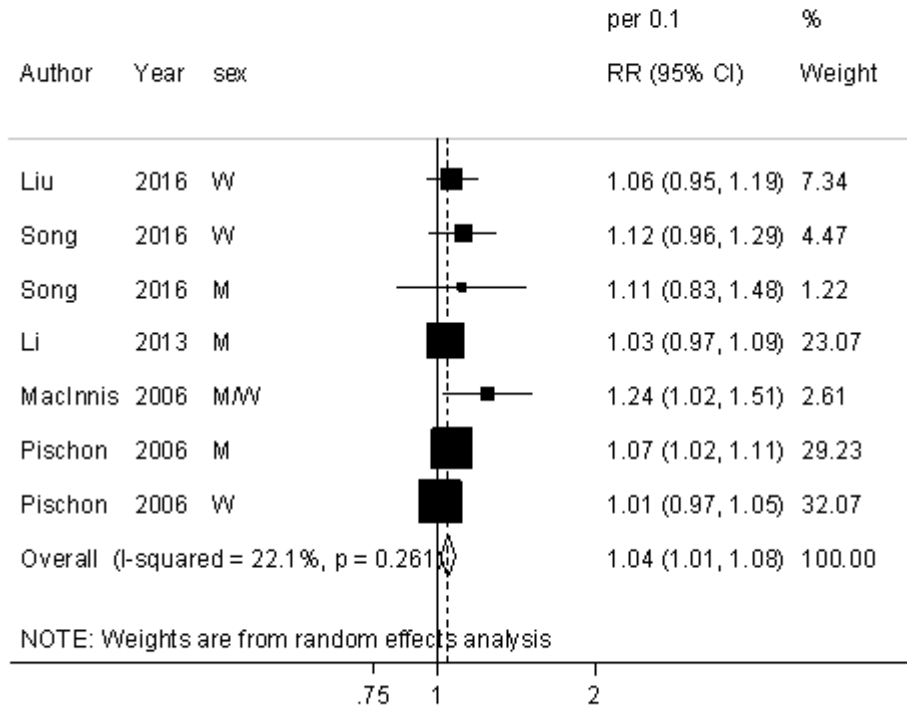

**B: waist to hip ratio and rectal cancer, nonlinear dose-response**

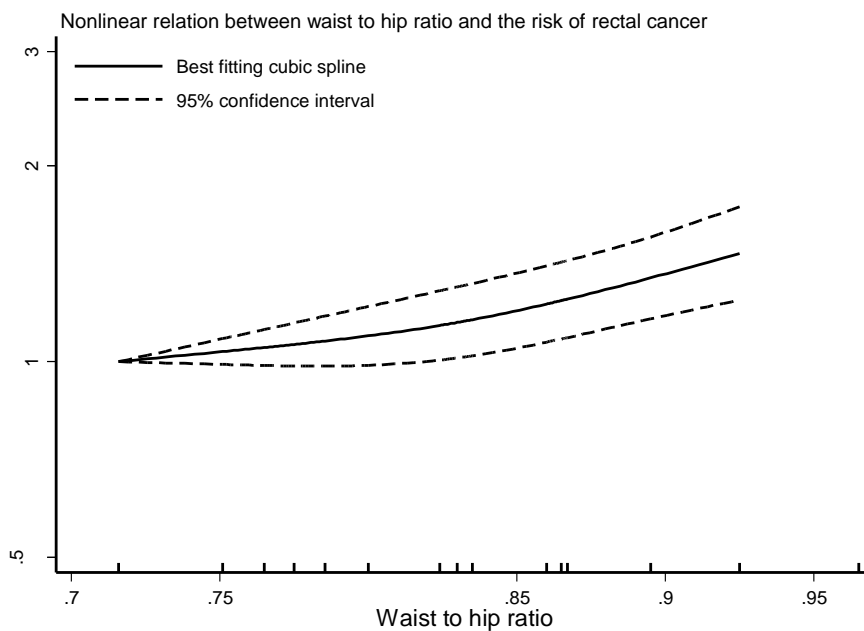

Supplement: 394_2017_1557_MOESM1_ESM.pdf [file 394_2017_1557_MOESM1_ESM.pdf]
